# Supplementary material for: Structural dynamics in the water and proton channels of photosystem II during the S2 to S3 transition
Source: PubMed Central journal article supplement (PMC8585918; doi:10.1038/s41467-021-26781-z), 2021-11-11
Supplement: 41467_2021_26781_MOESM1_ESM.pdf [file 41467_2021_26781_MOESM1_ESM.pdf]

## Supplementary Information for

### Structural Dynamics in the Water and Proton Channels of Photosystem II During the S<sub>2</sub> to S<sub>3</sub> Transition

Rana Hussein<sup>1,a</sup>, Mohamed Ibrahim<sup>1,a</sup>, Asmit Bhowmick<sup>2,a</sup>, Philipp S. Simon<sup>2,a</sup>, Ruchira Chatterjee<sup>2,a</sup>, Louise Lassalle<sup>2</sup>, Margaret Doyle<sup>2</sup>, Isabel Bogacz<sup>2</sup>, In-Sik Kim<sup>2</sup>, Mun Hon Cheah<sup>3</sup>, Sheraz Gul<sup>2</sup>, Casper de Lichtenberg<sup>3,4</sup>, Petko Chernev<sup>3</sup>, Cindy C. Pham<sup>2</sup>, Iris D. Young<sup>2</sup>, Sergio Carbajo<sup>5</sup>, Franklin D. Fuller<sup>5</sup>, Roberto Alonso-Mori<sup>5</sup>, Alex Batyuk<sup>5</sup>, Kyle D. Sutherlin<sup>2</sup>, Aaron S. Brewster<sup>2</sup>, Robert Bolotovskiy<sup>2</sup>, Derek Mendez<sup>2</sup>, James M. Holton<sup>2</sup>, Nigel W. Moriarty<sup>2</sup>, Paul D. Adams<sup>2,6</sup>, Uwe Bergmann<sup>7</sup>, Nicholas K. Sauter<sup>2</sup>, Holger Dobbek<sup>1</sup>, Johannes Messinger<sup>3,4\*</sup>, Athina Zouni<sup>1\*</sup>, Jan Kern<sup>2\*</sup>, Vittal K. Yachandra<sup>2\*</sup>, Junko Yano<sup>2\*</sup>

<sup>1</sup>Institut für Biologie, Humboldt-Universität zu Berlin, 10115 Berlin, Germany.

<sup>2</sup>Molecular Biophysics and Integrated Bioimaging Division, Lawrence Berkeley National Laboratory, Berkeley, CA 94720, USA.

<sup>3</sup>Department of Chemistry - Ångström, Molecular Biomimetics, Uppsala University, SE 75120 Uppsala, Sweden.

<sup>4</sup>Department of Chemistry, Umeå University, SE 90187 Umeå, Sweden.

<sup>5</sup>Linac Coherent Light Source, SLAC National Accelerator Laboratory, Menlo Park, CA 94025, USA.

<sup>6</sup>Department of Bioengineering, University of California, Berkeley, CA 94720, USA.

<sup>7</sup>Department of Physics, University of Wisconsin–Madison, Madison, WI 53706, USA.

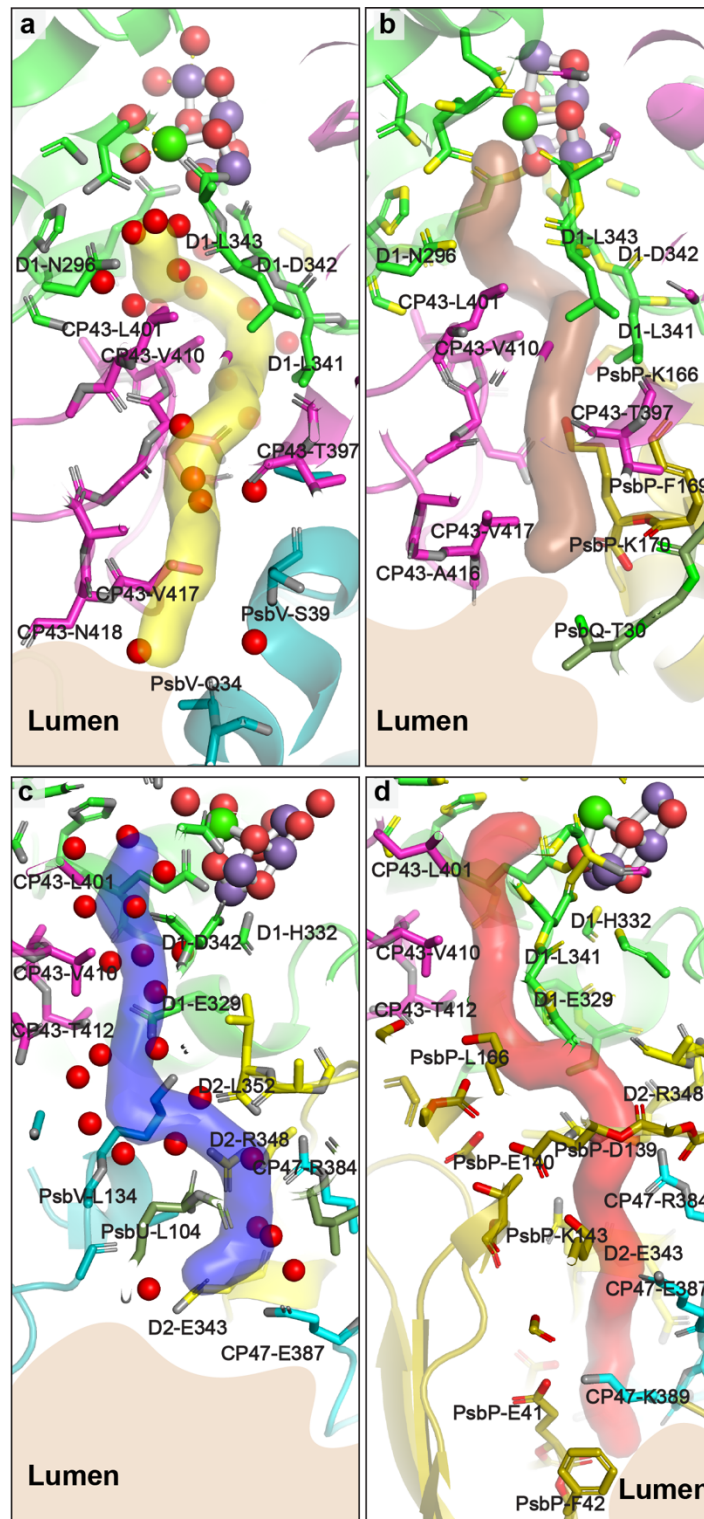

**Supplementary Figure 1. Analysis of the O1 channel in cyanobacteria and plants. (a, c)** represent branches A and B of the O1 channel in the cyanobacterial structure (PDB: 7RF2). **(b, d)** show the branches A and B of the O1 channel in the plant PS II structure (PDB: 3JCU). While details at the luminal termini are different between plants and cyanobacteria due to the different architecture of the luminal extrinsic part of the complex the region close to the OEC and the general direction and shape are highly conserved for both branches.

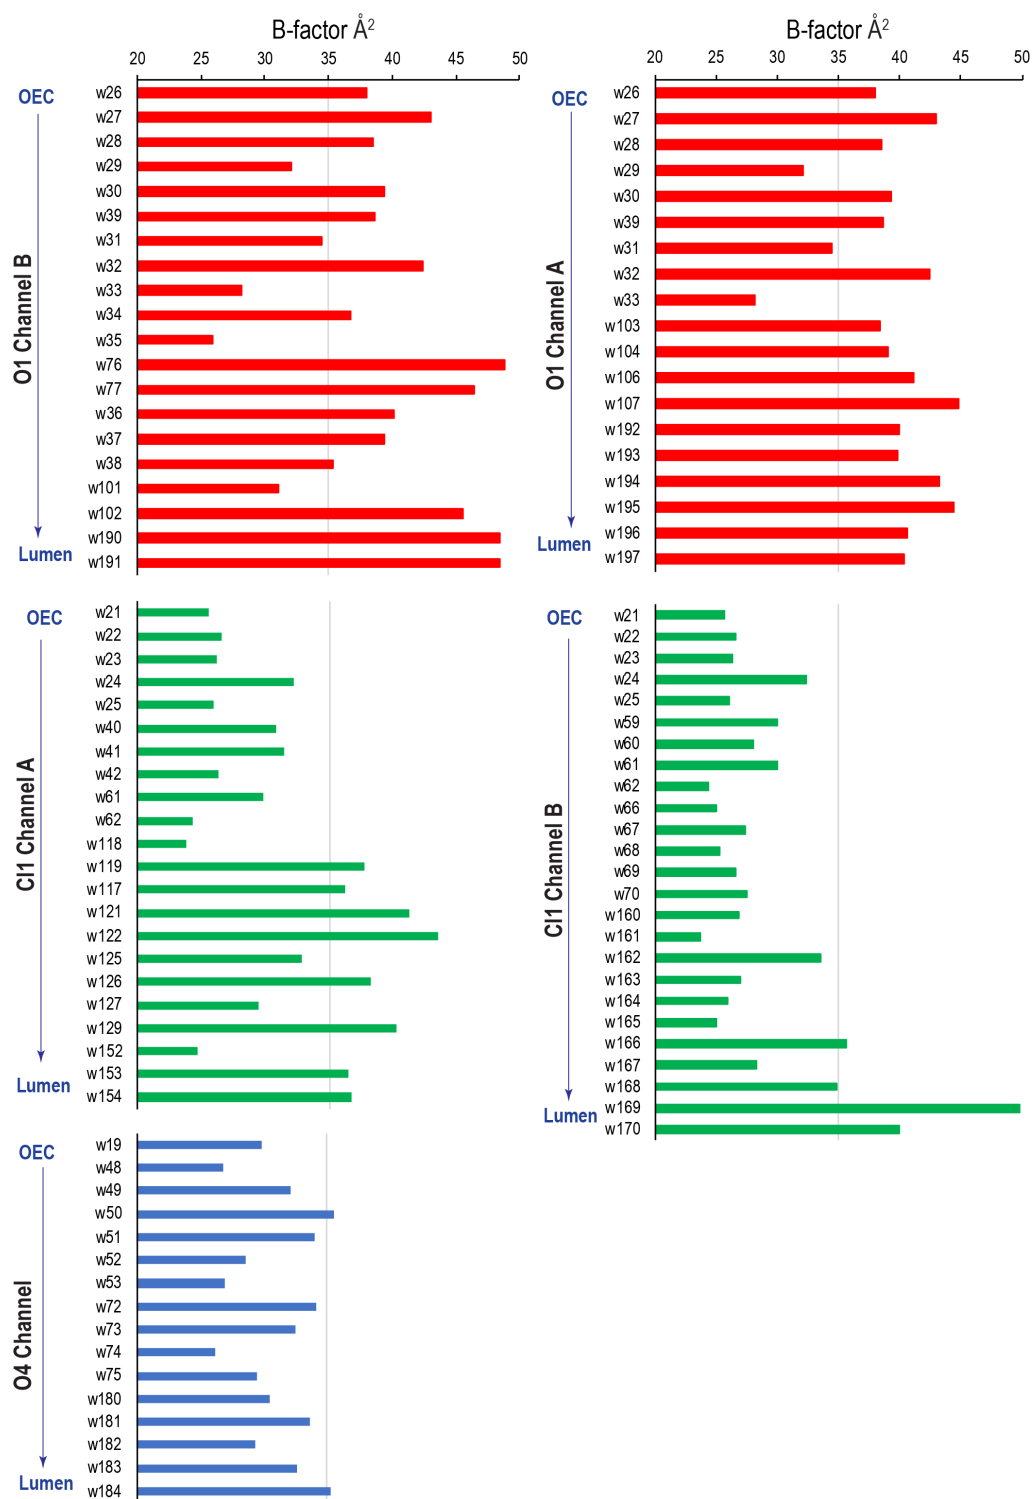

**Supplementary Figure 2. The B-factor values of the waters in the O1 channel A, O1 Channel B, C11 channel A, Channel B and O4 channel in the combined data (7RF1). Numbering is according to Supplementary Table 4. Source data are provided as a Source Data file.**

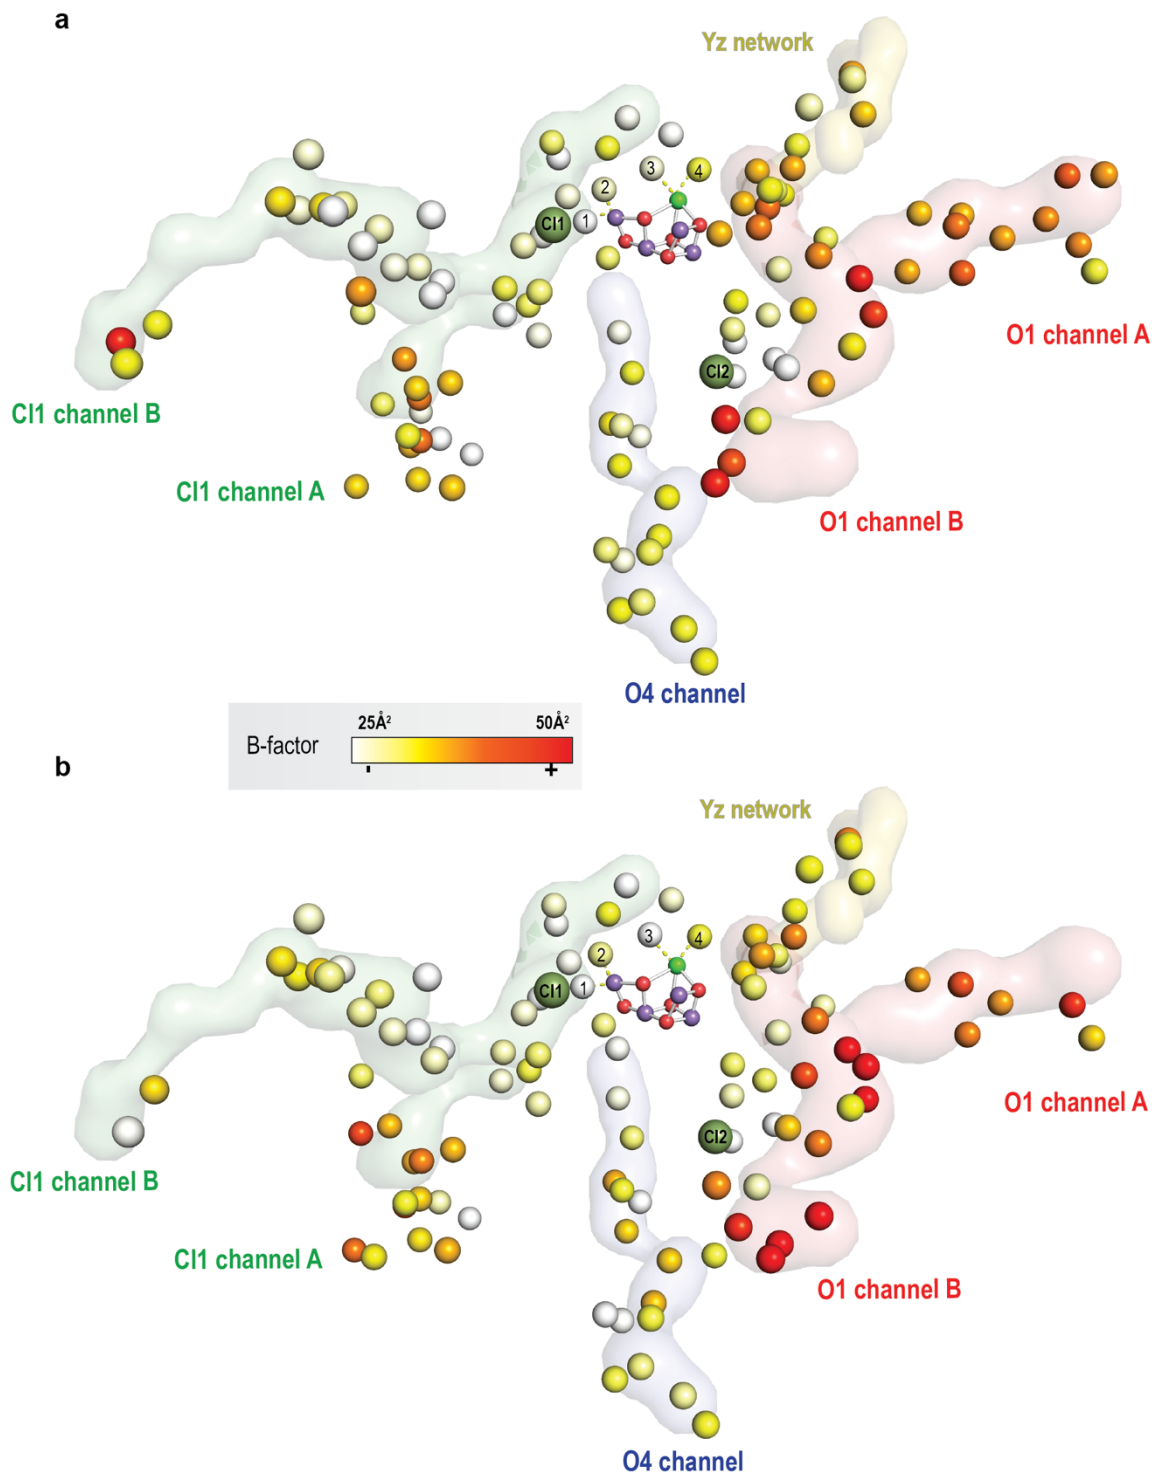

**Supplementary Figure 3. Water channels in the 1.89 Å resolution room temperature structure (7RF1) in both monomers m1 (a) and m2 (b).** The water molecules are represented in a color gradient scale, indicating the B factor of each water (white color for B-factor 25 to red color for B-factor 50 Å<sup>2</sup> for both monomers). The channels and the network are indicated by different colors, O1 Channel in red, O4 Channel in blue, Cl1 Channel in green, and Yz network in yellow.

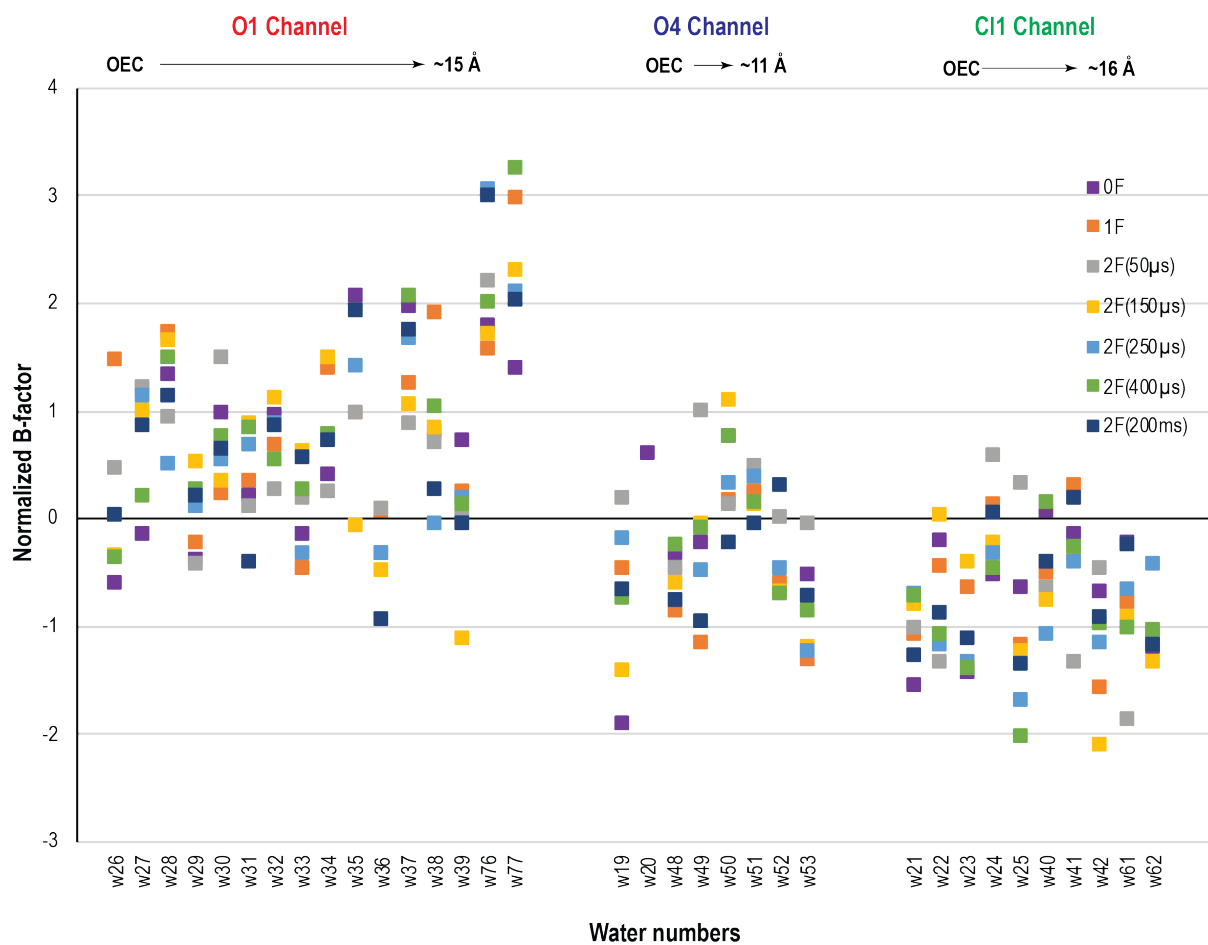

**Supplementary Figure 4. Comparison of the normalized B-factors of waters present in the water channels at 0F, 1F, 2F, and the time points between 1F and 2F.** The normalized B factors of the waters are shown as a function of their distance from the Mn cluster within the three discussed channels: O1, O4, and C11. Source data are provided as a Source Data file.

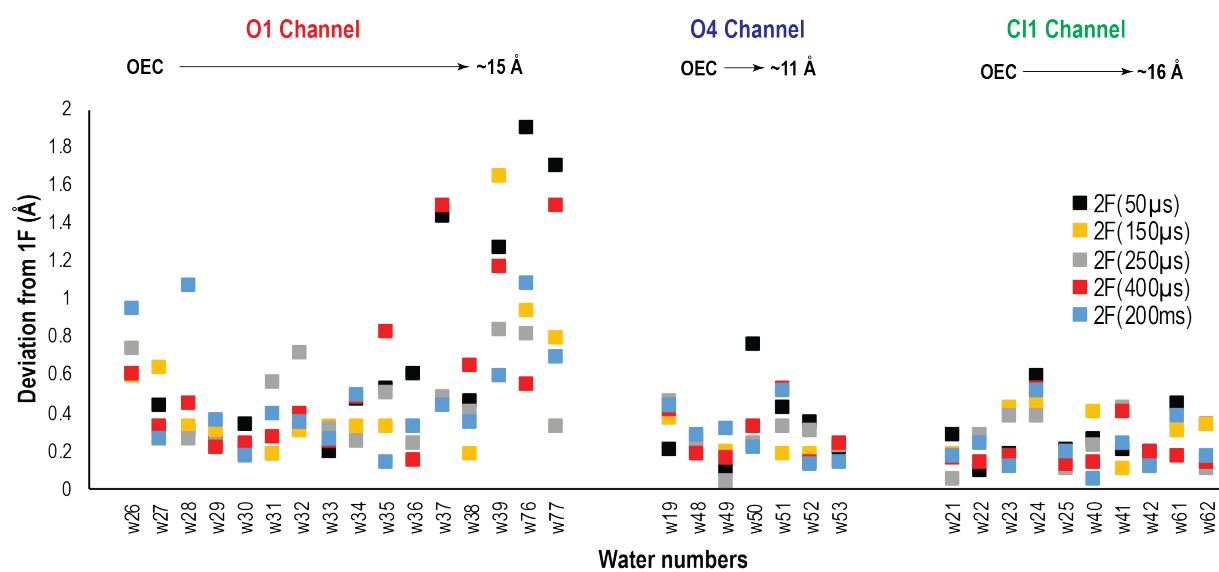

**Supplementary Figure 5. The deviation of water positions from the S<sub>2</sub>-state (1F) within water channels.** The deviation of the water positions for different time points in the S<sub>2</sub>-S<sub>3</sub> transition is shown as a function of their distance from the Mn cluster within the three discussed channels: O1, O4, and C11. Source data are provided as a Source Data file.

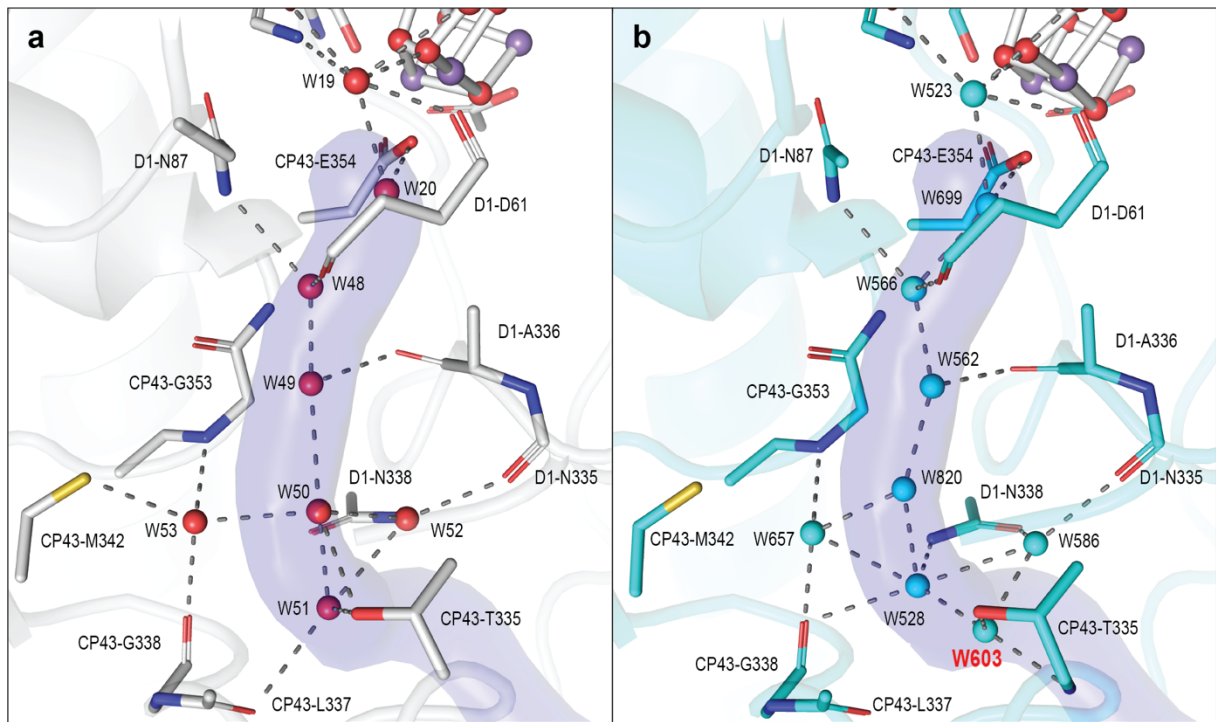

**Supplementary Figure 6. Structure of the O4 channel for the dark state at different temperature. Interaction distance between atoms up to 3.2 Å is shown as gray dashed line. The light blue surface represents the O4 channel. A) structure collected at room temperature (PDB ID:7RF2) ref. B) structure collected at cryo temperature with XFEL at 2.15 Å (PDB ID: 6JLJ) <sup>1</sup>. Extra water (W603) (labeled with red color) is detected only in the dark state in the cryo structure effecting the H-bonding networked of the O4 channel.**

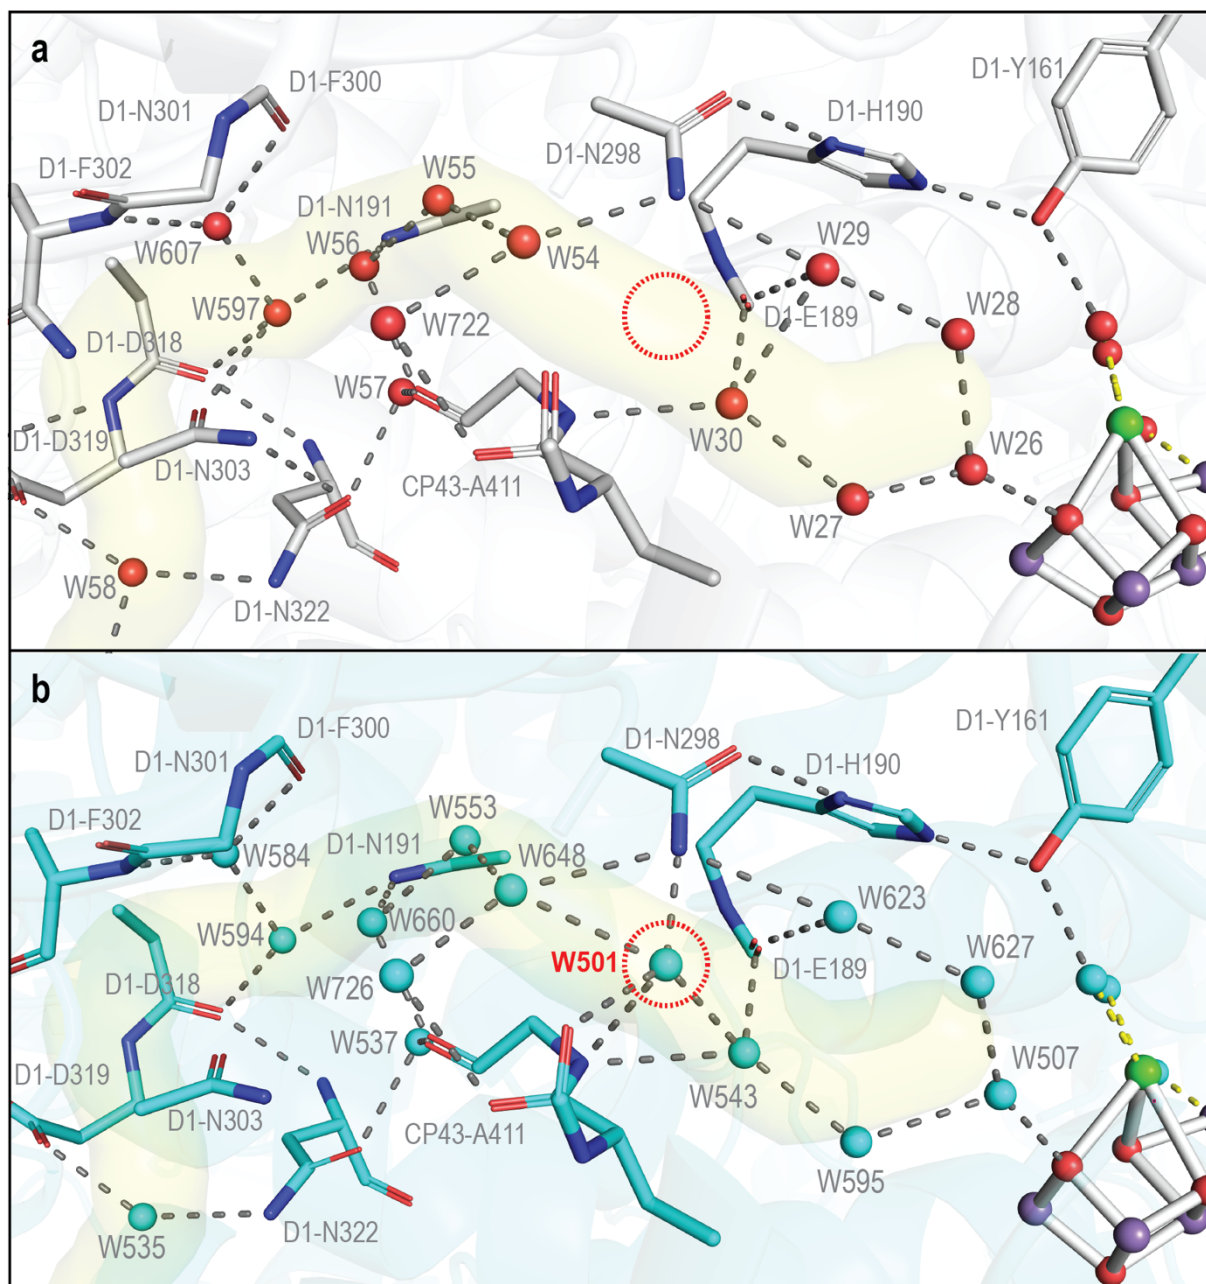

**Supplementary Figure 7. Yz network for dark state at different temperatures.** Hydrogen-bond distances connecting the  $\text{Mn}_4\text{CaO}_5$  cluster and Yz toward the luminal bulk side are shown as gray dashed lines and up to 3.2 Å. A) PSII structure with XFEL at RT (PDB ID 7RF2). B) PSII cryo structure with XFEL at 2.15 Å (PDB ID 6JLJ). Extra water (W501) (highlighted with red dashed circle) detected only at the cryo-structure and not in the RT-structure effecting the possible proton path out to the lumen for each structure. In the RT-structure only D1-N298 connects the penta-cluster waters (26-27-28-29-30) via W29 to W54 that proceed towards the lumen. However, in the cryo-structure, in addition to D1-N298, W501 is also connecting the penta cluster waters to the opposite side of the network that expands towards the lumen.



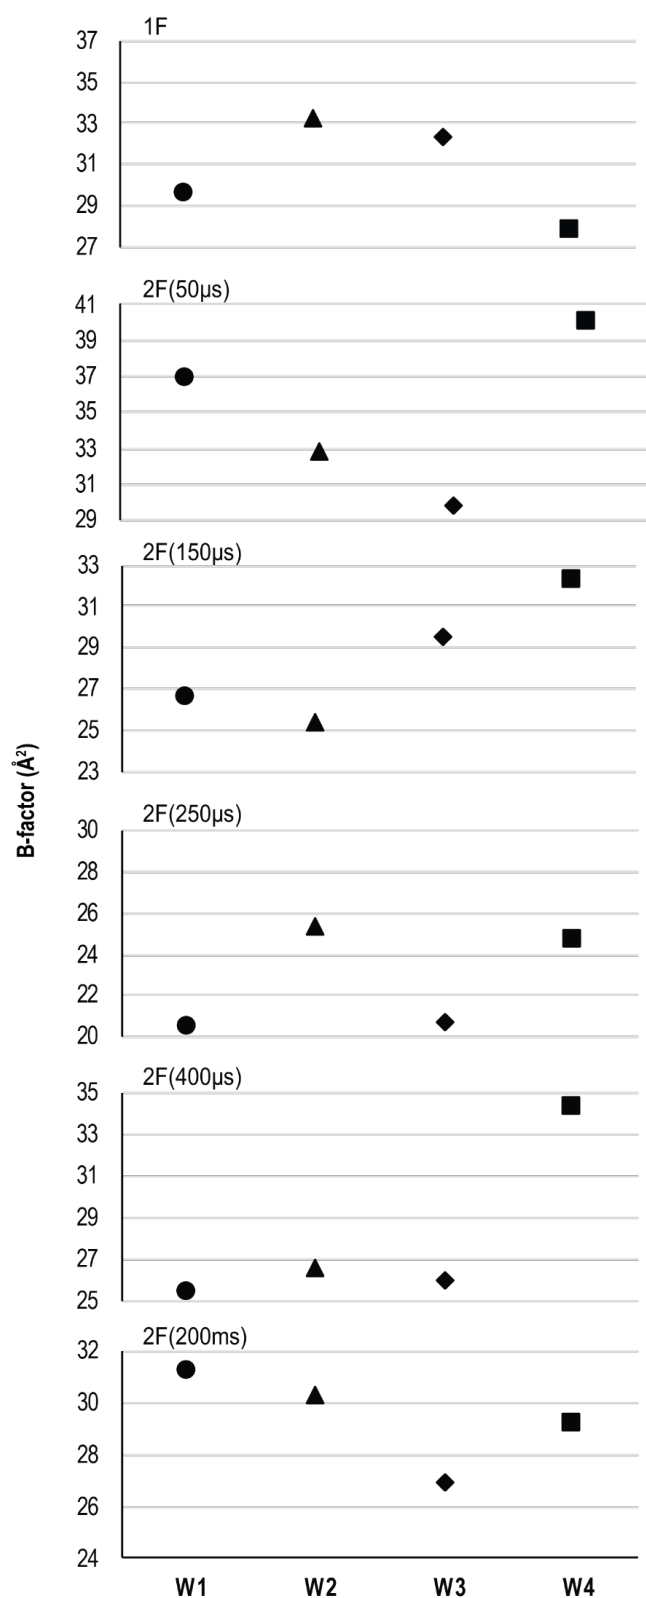

**Supplementary Figure 8. B-factors of OEC ligand waters at each time point in the  $S_2 \rightarrow S_3$  transition.** W4 shows higher B-factor after the second illumination than the other ligand waters (W1, W2 and W3), in the 2F(50µs) structure (PDB ID: 7RF4), the 2F(150 µs) structure (PDB ID: 7RF5), the 2F(250 µs) structure (PDB ID: 7RF6), and the 2F(400 µs) structure (PDB ID: 7RF7). Source data are provided as a Source Data file.

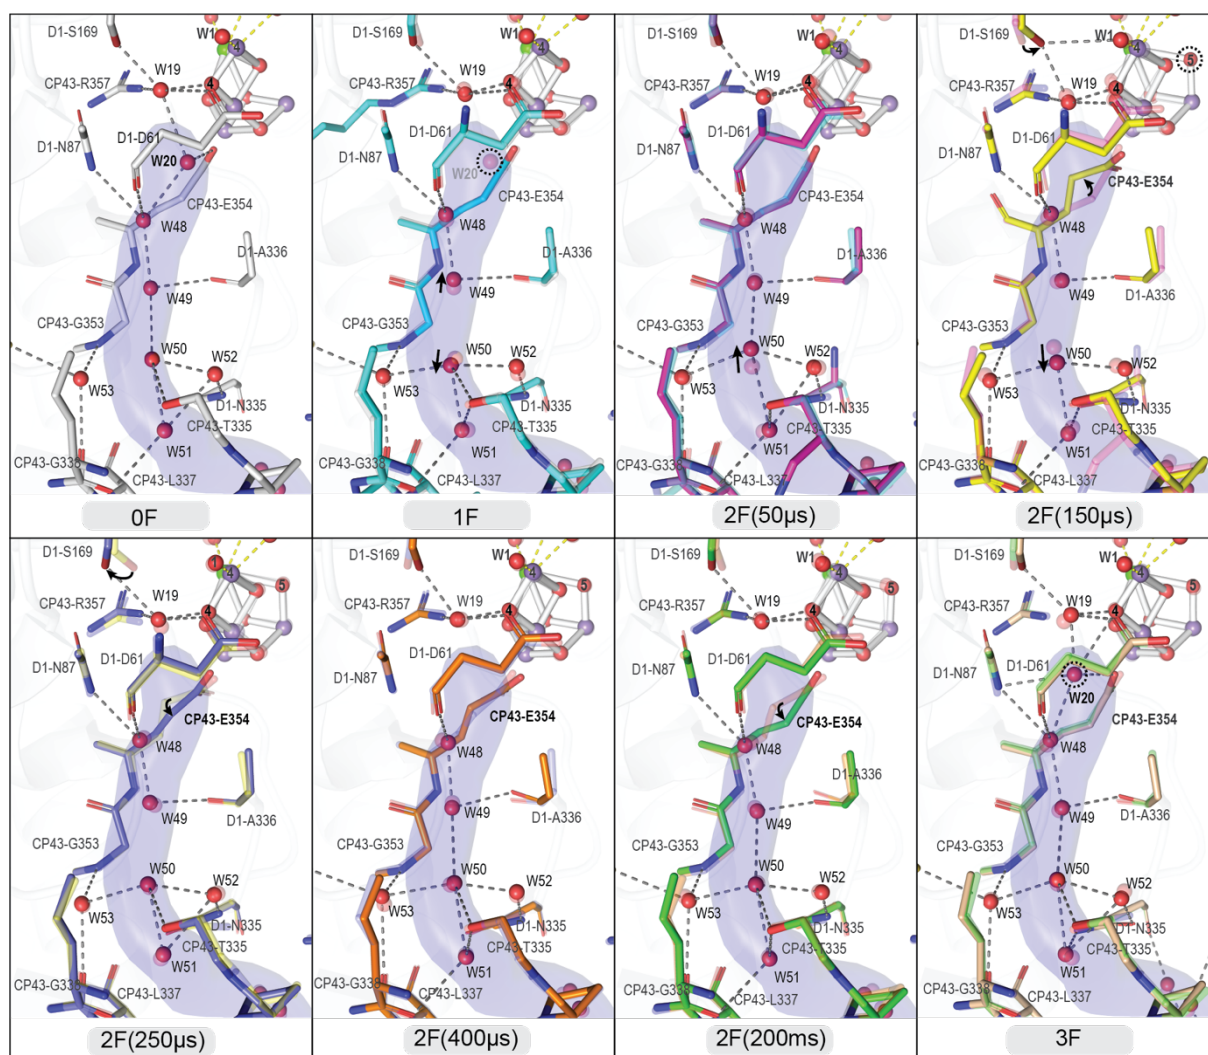

**Supplementary Figure 9. Structural changes in the O4 water channel for the different illumination states by XFEL at room temperature.** Interaction distances between atoms are shown in gray dashed line and up to 3.2 Å. Positional shifts of the water molecules (W49 and W50) and a.a residues (CP43-E354 and D1-S169) are indicated by black arrows. Structure at 0F is ( $S_1$  state) at 2.08 Å (PDB ID: 7RF2), after 1F ( $S_2$  state) at 2.26 Å (PDB ID: 7RF3), after 2F(50µs) (50µs after  $S_2$  state) at 2.27 Å (PDB ID: 7RF4), after 2F(150 µs) is (150µs after  $S_2$  state) at 2.23 Å (PDB ID: 7RF5), after 2F(250 µs) (250µs after  $S_2$  state) at 2.01 Å (PDB ID: 7RF6), after 2F(400 µs) (400 µs after  $S_2$  state) at 2.09 Å (PDB ID: 7RF7), after 2F (200 µs) ( $S_3$  state) at 2.09 Å (PDB ID: 7RF8), after 3F ( $S_0$  state) at 2.04 Å (PDB ID: 6DHP)<sup>2</sup>.

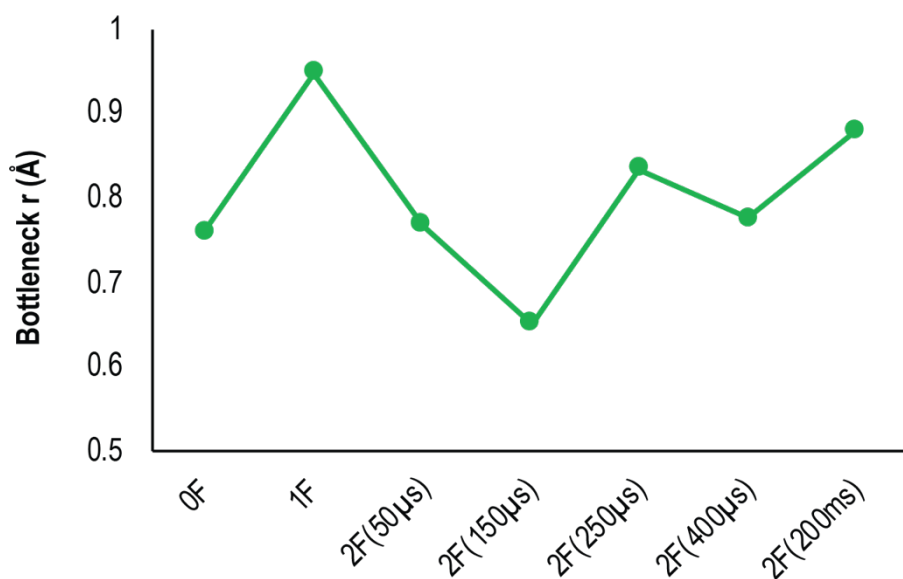

**Supplementary Figure 10. Changes in C11 channel A bottleneck radius at different time points.** Analysis of the bottleneck radius build by D1-E65, D1-P66, D1-V67 and D2-E312 are performed using caver 3.0 Pymol plugin <sup>3</sup> for 0F model (PDB ID: 7RF2), 1F model (PDB ID: 7RF3), 2F(50µs) model (PDB ID: 7RF4), 2F(150 µs) model (PDB ID: 7RF5), 2F(250 µs) model (PDB ID: 7RF6 ), 2F(400 µs) model (PDB ID: 7RF7), 2F (200 µs) model (PDB ID: 7RF7). Source data are provided as a Source Data file.

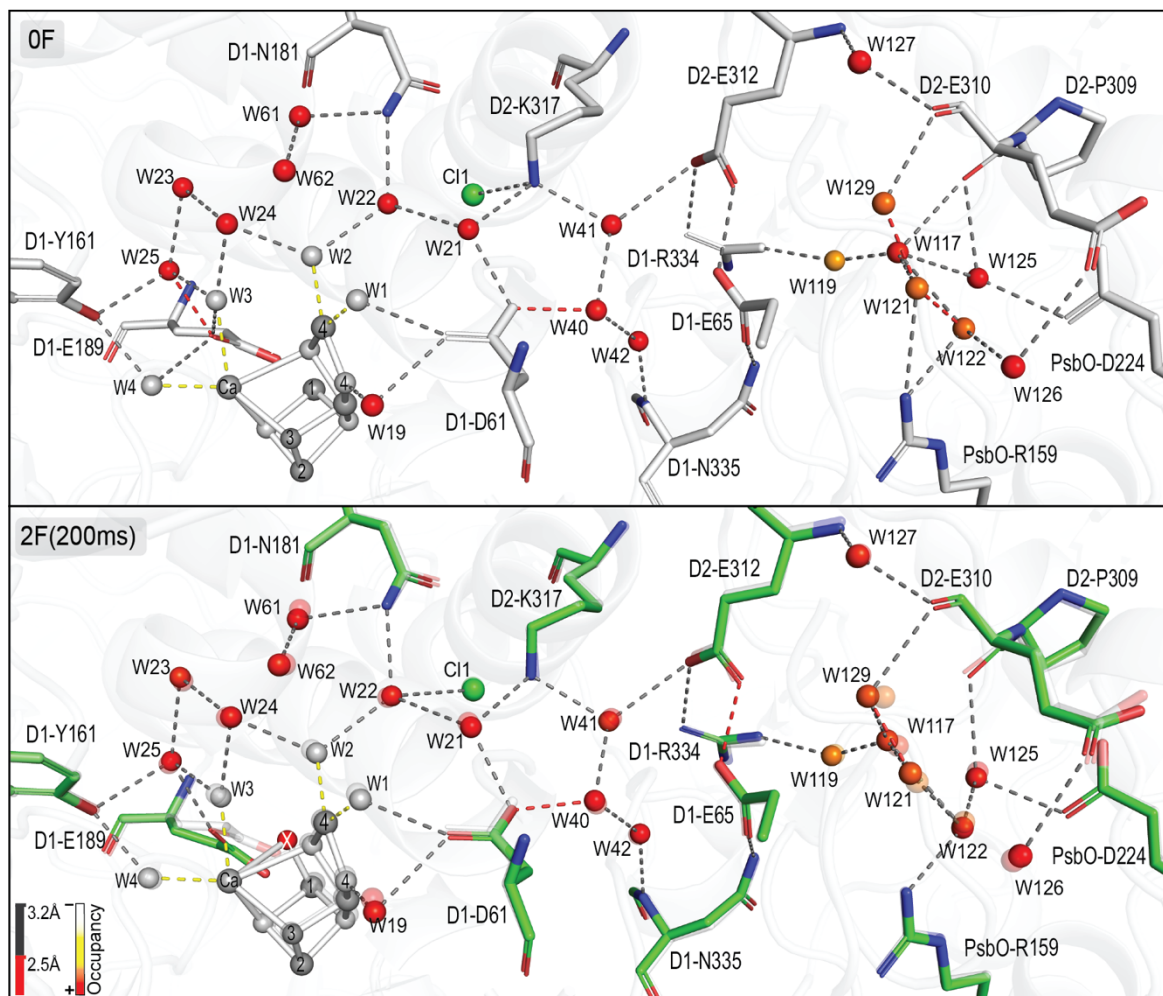

**Supplementary Figure 11. Structural changes in the Cl1 water channel detected in the dark state structure (0F, PDB ID: 7RF2) and S3-rich structure (2F (200ms), PDB ID: 7RF8).** 0F model is colored with white. 2F (200ms) model is colored with green and overlaid with the 0F model, shown in a transparent color. The waters are colored based on their occupancies, represented by a color gradient from white to red. The H-bond length is color-coded, as described at the bottom left.

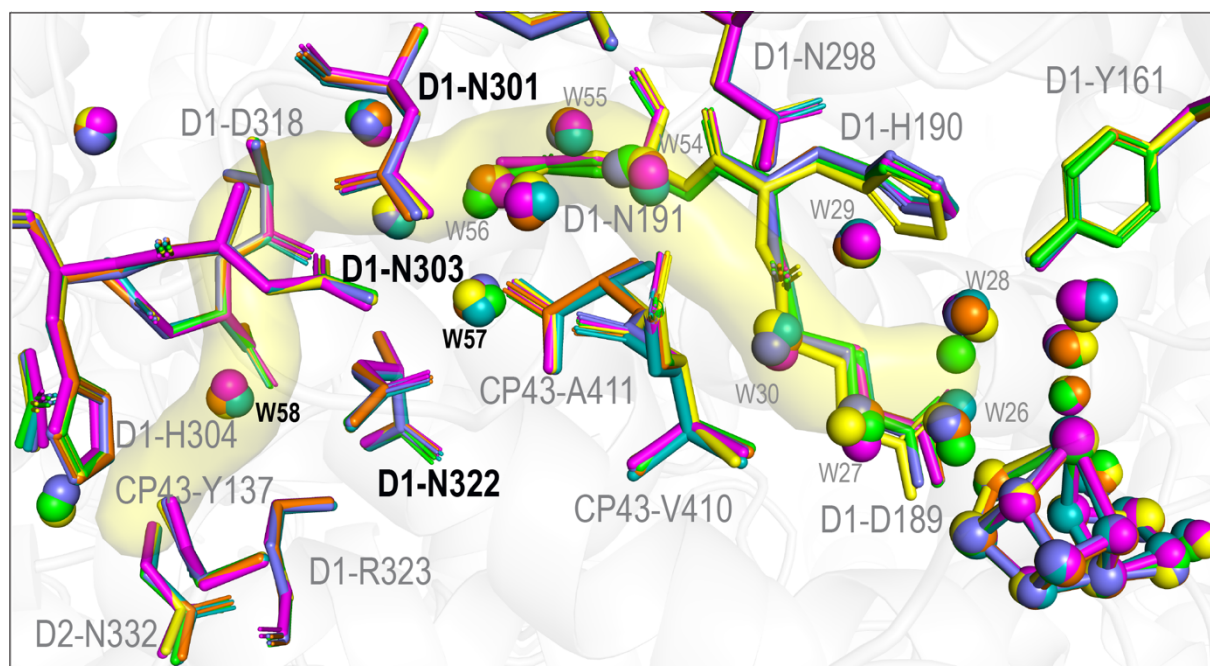

**Supplementary Figure 12. Structural changes in the Yz network channel during the  $S_2 \rightarrow S_3$  transition.** The structure of the Yz network is shown for all time points in the  $S_2 \rightarrow S_3$  transition (1F (teal) and 2F time points (50  $\mu$ s: magenta; 150  $\mu$ s: yellow; 250  $\mu$ s: slate; 400  $\mu$ s: orange; 200 ms: green)).

**Supplementary Table 1: Channel nomenclature in literature.** There are multiple names used for identifying the water and proton channels in PS II. The table summarizes their correspondence.

|               | Ho and Styring <sup>4</sup> | Murray and Barber <sup>5</sup> | Gabdulkhakov et al. <sup>6</sup> | Umena et al. <sup>7</sup> | Vassieliev et al. <sup>8</sup> | Ogata et al. <sup>9</sup> | Sakashita et al. <sup>10</sup> | Weisz et al. <sup>11</sup> |
|---------------|-----------------------------|--------------------------------|----------------------------------|---------------------------|--------------------------------|---------------------------|--------------------------------|----------------------------|
| Method        | Surface contact calculation |                                | Xe                               | H-bond network analysis   | MD simulation                  |                           |                                | ROS                        |
| PDB ID        | 2AXT                        |                                | 3BZ1                             | 3ARC (2WU2)               | 3ARC (2WU2)                    | 3ARC (2WU2)               | 3ARC (2WU2)                    |                            |
| Resolution    | 3.00 Å                      |                                | 2.90 Å                           | 1.90 Å                    | 1.90 Å                         | 1.90 Å                    | 1.90 Å                         |                            |
| O1 Channel A  | large                       | <i>channel ii</i>              | B1                               |                           | 4.A                            |                           | O1-water chain                 | Arm 2                      |
| O1 Channel B  | large                       | <i>channel ii</i>              | B2                               |                           | 4B                             |                           |                                | Arm 2                      |
| O4 Channel    | narrow                      | NA                             | E, F                             | 4.c                       | 2                              | Path 3                    | O4-water chain                 |                            |
|               |                             |                                | D                                |                           | Channel X                      |                           |                                | Arm 3                      |
| C11 Channel A | broad                       | -                              | G                                | 4.b                       | 1                              |                           | E65/E312 channel               |                            |
| C11 Channel B |                             | <i>channel iii</i>             | C, D                             |                           | 3                              | Path 2                    |                                | Arm 1                      |
| C12 network   |                             |                                |                                  | 4.c                       |                                |                           |                                |                            |
|               | back                        | <i>channel i</i>               | A1, A2                           | 3.b                       | 5                              | Path 1                    |                                | Arm 3                      |

**Supplementary Table 2: Merging and refinement statistics**

| State                                          | Combined                                      | 0F <sup>+</sup>                               | 1F <sup>+</sup>                               | 2F (50 μs) <sup>+</sup>                       | 2F (150 μs) <sup>+</sup>                      | 2F (250 μs) <sup>+</sup>                      | 2F (400 μs) <sup>+</sup>                      | 2F <sup>+</sup>                               |
|------------------------------------------------|-----------------------------------------------|-----------------------------------------------|-----------------------------------------------|-----------------------------------------------|-----------------------------------------------|-----------------------------------------------|-----------------------------------------------|-----------------------------------------------|
| PDB ID                                         | 7RF1                                          | 7RF2                                          | 7RF3                                          | 7RF4                                          | 7RF5                                          | 7RF6                                          | 7RF7                                          | 7RF8                                          |
| Resolution range refined (Å)                   | 33.670-1.890                                  | 33.638 - 2.080                                | 33.545 - 2.260                                | 33.453 - 2.270                                | 33.698 - 2.230                                | 33.588 - 2.010                                | 33.651 - 2.090                                | 33.649 - 2.090                                |
| Resolution range upper bin (Å)                 | 1.923-1.890                                   | 2.116 - 2.080                                 | 2.299 - 2.260                                 | 2.309 - 2.270                                 | 2.268 - 2.230                                 | 2.0345 - 2.010                                | 2.126 - 2.090                                 | 2.216 - 2.090                                 |
| Wavelength (Å)                                 | 1.302                                         | 1.302                                         | 1.302                                         | 1.302                                         | 1.302                                         | 1.303                                         | 1.302                                         | 1.302                                         |
| Space group                                    | P2 <sub>1</sub> 2 <sub>1</sub> 2 <sub>1</sub> | P2 <sub>1</sub> 2 <sub>1</sub> 2 <sub>1</sub> | P2 <sub>1</sub> 2 <sub>1</sub> 2 <sub>1</sub> | P2 <sub>1</sub> 2 <sub>1</sub> 2 <sub>1</sub> | P2 <sub>1</sub> 2 <sub>1</sub> 2 <sub>1</sub> | P2 <sub>1</sub> 2 <sub>1</sub> 2 <sub>1</sub> | P2 <sub>1</sub> 2 <sub>1</sub> 2 <sub>1</sub> | P2 <sub>1</sub> 2 <sub>1</sub> 2 <sub>1</sub> |
| Unit cell parameters (Å)                       | a=117.0<br>b=221.6<br>c=307.7                 | a=116.9<br>b=221.6<br>c=307.8                 | a=117.0<br>b=221.6<br>c=307.9                 | a=117.1<br>b=222.1<br>c=308.4                 | a=117.0<br>b=221.8<br>c=308.2                 | a=117.0<br>b=221.9<br>c=308.3                 | a=117.0<br>b=221.7<br>c=308.2                 | a=117.0<br>b=221.6<br>c=307.8                 |
| Lattices merged                                | 111922                                        | 11734 <sup>+</sup>                            | 4464 <sup>+</sup>                             | 5357 <sup>+</sup>                             | 6195 <sup>+</sup>                             | 8659 <sup>+</sup>                             | 5546 <sup>+</sup>                             | 10043 <sup>+</sup>                            |
| Unique reflections                             | 632624                                        | 474828                                        | 370481                                        | 367301                                        | 386505                                        | 535670                                        | 468621                                        | 468019                                        |
| (upper bin)                                    | (31359)                                       | (23014)                                       | (17988)                                       | (17756)                                       | (18749)                                       | (25929)                                       | (22792)                                       | (22666)                                       |
| Completeness                                   | 99.97%                                        | 99.77%                                        | 99.60%                                        | 99.61%                                        | 99.64%                                        | 99.78%                                        | 99.72%                                        | 99.75%                                        |
| (upper bin)                                    | (99.9%)                                       | (97.48%)                                      | (97.47%)                                      | (97.06%)                                      | (97.52%)                                      | (97.34%)                                      | (97.60%)                                      | (97.42%)                                      |
| CC <sub>1/2</sub>                              | 99.6%                                         | 98.0%                                         | 96.2%                                         | 96.7%                                         | 96.5%                                         | 97.7%                                         | 97.2%                                         | 97.9%                                         |
| (upper bin)                                    | (2.9%)                                        | (5.4%)                                        | (9.1%)                                        | (4.7%)                                        | (5.6%)                                        | (5.1%)                                        | (7.7%)                                        | (4.4%)                                        |
| I/σ <sub>H<sub>14</sub></sub> (I) <sup>†</sup> | 31.2                                          | 13.2                                          | 11.8                                          | 11.8                                          | 8.0                                           | 14.3                                          | 12.3                                          | 12.8                                          |
| (upper bin)                                    | (0.4)                                         | (0.6)                                         | (0.9)                                         | (0.6)                                         | (0.5)                                         | (0.6)                                         | (0.7)                                         | (0.6)                                         |
| Wilson B-factor                                | 30.3                                          | 34.4                                          | 37.8                                          | 41.3                                          | 39.1                                          | 32.7                                          | 34.4                                          | 37.6                                          |
| R-factor                                       | 17.09                                         | 18.52                                         | 17.82                                         | 18.18                                         | 17.58                                         | 18.02                                         | 18.56                                         | 18.10                                         |
| R-free                                         | 21.41                                         | 23.85                                         | 23.79                                         | 24.43                                         | 23.30                                         | 22.70                                         | 23.92                                         | 23.88                                         |
| Number of atoms                                | 104289                                        | 103675                                        | 103283                                        | 103257                                        | 105567                                        | 106133                                        | 106087                                        | 105942                                        |
| Number non-hydrogen atoms                      | 52524                                         | 52138                                         | 51715                                         | 51603                                         | 52802                                         | 53366                                         | 53322                                         | 53252                                         |
| Ligands                                        | 212                                           | 187                                           | 192                                           | 196                                           | 198                                           | 195                                           | 197                                           | 192                                           |
| Waters                                         | 1952                                          | 1994                                          | 1573                                          | 1415                                          | 1409                                          | 1973                                          | 1929                                          | 1900                                          |
| Protein residues                               | 5302                                          | 5302                                          | 5302                                          | 5302                                          | 5302                                          | 5302                                          | 5302                                          | 5302                                          |
| RMS (bonds)                                    | 0.01                                          | 0.01                                          | 0.01                                          | 0.01                                          | 0.01                                          | 0.01                                          | 0.01                                          | 0.01                                          |
| RMS (angles)                                   | 1.52                                          | 1.51                                          | 1.45                                          | 1.50                                          | 1.45                                          | 1.43                                          | 1.43                                          | 1.46                                          |
| Ramachandran favored                           | 97.3%                                         | 97.3%                                         | 97.2%                                         | 96.5%                                         | 96.8%                                         | 97.4%                                         | 97.4%                                         | 97.1%                                         |
| Ramachandran outliers                          | 0.3%                                          | 0.2%                                          | 0.2%                                          | 0.3%                                          | 0.3%                                          | 0.1%                                          | 0.1%                                          | 0.2%                                          |
| Clashscore                                     | 5.7                                           | 4.4                                           | 5.1                                           | 5.7                                           | 5.2                                           | 4.1                                           | 5.3                                           | 4.8                                           |
| Average B-factor                               | 39.0                                          | 40.6                                          | 43.7                                          | 47.2                                          | 46.0                                          | 39.3                                          | 40.1                                          | 45.5                                          |

<sup>+</sup> Note that the merged datasets for the individual time points are the same as used in ref. 2 but refined models are different.

<sup>†</sup> as defined in ref. <sup>12</sup>

**Supplementary Table 3.** Water numbering convention used in this work and relation to residue numbers in pdb files (note that numbers are only given for the first monomer in each model, “x” indicates water not present, for W1-W4 only the refined component is given for 2F (150  $\mu$ s) and later time points).

| Numbering in manuscript | Channel   | Combined (7RF1) | 0F (7RF2) | 1F (7RF3) | 2F (50 $\mu$ s) (7RF4) | 2F (150 $\mu$ s) (7RF5) | 2F (250 $\mu$ s) (7RF6) | 2F (400 $\mu$ s) (7RF7) | 2F (7RF8) |
|-------------------------|-----------|-----------------|-----------|-----------|------------------------|-------------------------|-------------------------|-------------------------|-----------|
| W1                      |           | A/515           | A/528     | A/516     | A/526                  | A/719                   | A/712                   | A/518                   | A/505     |
| W2                      |           | A/555           | A/579     | A/543     | A/557                  | A/728                   | A/718                   | A/533                   | A/537     |
| W3                      |           | A/603           | A/612     | A/582     | A/584                  | A/789                   | A/803                   | A/593                   | A/602     |
| W4                      |           | A/525           | A/532     | A/522     | A/513                  | A/739                   | A/728                   | A/564                   | A/549     |
| W19                     | O4        | A/519           | A/526     | A/510     | A/517                  | A/715                   | A/727                   | A/515                   | A/529     |
| W20                     | O4        | x               | C/675     | x         | x                      | x                       | x                       | x                       | x         |
| W21                     | C11A/B    | A/512           | A/547     | A/536     | A/569                  | A/756                   | A/726                   | A/514                   | A/531     |
| W22                     | C11A/B    | A/550           | A/571     | A/557     | A/536                  | A/752                   | A/729                   | A/554                   | A/555     |
| W23                     | C11A/B    | A/575           | A/588     | A/548     | A/559                  | A/791                   | A/784                   | A/574                   | A/603     |
| W24                     | C11A/B    | A/622           | A/602     | A/613     | A/581                  | A/794                   | A/817                   | A/616                   | A/593     |
| W25                     | C11A/B    | A/541           | A/507     | A/540     | A/537                  | A/734                   | A/713                   | A/546                   | A/538     |
| W26                     | O1A/B     | A/612           | A/575     | A/604     | A/566                  | A/761                   | A/732                   | A/552                   | A/546     |
| W27                     | O1A/B     | A/505           | A/508     | A/515     | A/502                  | A/710                   | A/747                   | A/535                   | A/508     |
| W28                     | O1A/B, YZ | A/619           | A/601     | A/589     | A/604                  | A/775                   | A/828                   | A/615                   | A/625     |
| W29                     | O1A/B, YZ | A/576           | A/613     | A/551     | A/575                  | A/764                   | A/761                   | A/582                   | A/600     |
| W30                     | O1A/B, YZ | A/506           | A/527     | A/513     | A/533                  | A/714                   | A/768                   | A/513                   | A/509     |
| W31                     | O1A/B     | A/553           | A/550     | A/528     | A/549                  | A/731                   | A/704                   | A/510                   | A/518     |
| W32                     | O1A/B     | A/637           | A/631     | A/616     | A/614                  | A/808                   | A/838                   | A/638                   | A/626     |
| W33                     | O1A/B     | A/608           | A/595     | A/590     | A/608                  | A/777                   | A/777                   | A/617                   | A/611     |
| W34                     | O1B       | A/524           | A/524     | V/314     | A/525                  | A/732                   | A/733                   | A/521                   | A/517     |
| W35                     | O1B       | C/669           | C/618     | C/641     | C/612                  | C/664                   | C/614                   | C/609                   | C/608     |
| W36                     | O1B       | D/575           | A/577     | D/542     | A/551                  | D/512                   | A/775                   | D/555                   | D/564     |
| W37                     | O1B       | U/221           | U/211     | U/202     | U/224                  | U/209                   | U/220                   | U/219                   | U/204     |
| W38                     | O1B       | V/356           | V/351     | V/337     | V/343                  | V/341                   | V/351                   | V/344                   | V/359     |
| W39                     | O1A/B     | A/620           | A/617     | A/599     | A/602                  | A/803                   | A/748                   | A/608                   | A/621     |
| W40                     | C11A      | A/534           | A/521     | A/519     | A/528                  | A/707                   | A/714                   | A/529                   | A/510     |
| W41                     | C11A      | D/567           | D/527     | D/535     | D/532                  | D/519                   | D/543                   | D/521                   | D/550     |
| W42                     | C11A      | A/630           | A/599     | A/612     | A/609                  | A/798                   | A/833                   | A/620                   | A/614     |
| W43                     | C12       | A/616           | A/585     | A/544     | A/577                  | A/788                   | A/780                   | A/588                   | A/587     |
| W44                     | C12       | C/764           | A/620     | A/608     | A/599                  | A/802                   | A/830                   | C/725                   | A/617     |
| W45                     | C12       | C/646           | C/653     | C/664     | C/636                  | C/676                   | C/682                   | C/645                   | C/626     |
| W46                     | C12       | C/710           | C/660     | C/690     | C/676                  | C/679                   | C/709                   | C/690                   | C/695     |
| W47                     | C12       | C/692           | C/636     | C/673     | C/629                  | C/668                   | C/701                   | C/669                   | C/669     |
| W48                     | O4        | A/535           | A/581     | A/549     | A/563                  | A/782                   | A/791                   | A/559                   | A/558     |
| W49                     | O4        | A/557           | A/589     | A/574     | A/539                  | A/724                   | A/781                   | A/599                   | A/569     |
| W50                     | O4        | C/723           | C/728     | C/686     | C/694                  | C/700                   | C/731                   | C/702                   | C/682     |
| W51                     | O4        | C/753           | C/750     | C/705     | C/681                  | A/797                   | C/730                   | C/708                   | C/710     |
| W52                     | O4        | A/548           | A/574     | A/545     | A/542                  | A/740                   | A/703                   | A/539                   | A/522     |
| W53                     | O4        | C/696           | C/687     | C/679     | C/678                  | C/649                   | C/677                   | C/665                   | C/688     |
| W54                     | YZ        | A/623           | A/584     | C/650     | C/635                  | A/758                   | C/743                   | A/609                   | A/605     |
| W55                     | YZ        | A/521           | A/530     | A/517     | A/512                  | A/723                   | A/710                   | A/508                   | A/535     |
| W56                     | YZ        | C/631           | C/674     | C/637     | C/608                  | C/627                   | C/626                   | C/649                   | C/603     |
| W57                     | YZ        | A/504           | A/515     | A/503     | A/504                  | A/709                   | A/738                   | A/502                   | A/519     |
| W58                     | YZ        | A/590           | A/572     | A/588     | A/532                  | A/768                   | A/763                   | A/571                   | A/583     |
| W59                     | C11B      | A/592           | A/605     | A/594     | A/598                  | A/793                   | A/806                   | A/600                   | A/571     |
| W60                     | C11B      | D/554           | D/590     | D/556     | D/565                  | D/562                   | D/553                   | D/539                   | D/583     |
| W61                     | C11A/B    | A/617           | A/614     | A/601     | A/558                  | A/795                   | A/814                   | A/590                   | A/601     |
| W62                     | C11A/B    | A/510           | A/555     | A/563     | A/544                  | A/711                   | A/724                   | A/534                   | A/514     |
| W66                     | C11B      | D/548           | D/541     | D/550     | D/553                  | O/335                   | D/536                   | D/543                   | D/532     |
| W67                     | C11B      | D/558           | O/344     | D/562     | O/318                  | O/333                   | D/540                   | O/324                   | O/322     |
| W68                     | C11B      | D/608           | D/592     | D/581     | D/586                  | D/573                   | D/579                   | D/558                   | D/582     |
| W69                     | C11B      | D/579           | O/330     | D/522     | D/535                  | O/309                   | D/574                   | D/529                   | D/519     |
| W70                     | C11B      | D/635           | D/630     | D/600     | D/599                  | D/596                   | D/614                   | D/624                   | D/622     |
| W71                     | O4        | A/511           | A/531     | A/530     | A/543                  | A/745                   | U/218                   | A/579                   | A/567     |
| W72                     | O4        | D/611           | D/609     | D/585     | D/591                  | D/591                   | D/596                   | D/600                   | D/608     |
| W73                     | O4        | U/237           | U/241     | U/225     | U/227                  | U/219                   | U/230                   | U/229                   | U/226     |
| W74                     | O4        | O/326           | C/642     | O/326     | O/320                  | O/316                   | O/322                   | C/652                   | C/648     |
| W75                     | O4        | U/218           | U/216     | U/210     | U/214                  | U/213                   | U/209                   | U/209                   | U/213     |



**Supplementary Table 3 continued**

| Numbering in manuscript | Channel | Combined (7RF1) | 0F (7RF2) | 1F (7RF3) | 2F (50 $\mu$ s) (7RF4) | 2F (150 $\mu$ s) (7RF5) | 2F (250 $\mu$ s) (7RF6) | 2F (400 $\mu$ s) (7RF7) | 2F (7RF8) |
|-------------------------|---------|-----------------|-----------|-----------|------------------------|-------------------------|-------------------------|-------------------------|-----------|
| W76                     | O1B     | C/670           | C/748     | C/717     | A/612                  | C/637                   | C/675                   | C/628                   | C/619     |
| W77                     | O1B     | V/363           | V/358     | V/322     | C/685                  | V/313                   | V/349                   | V/363                   | V/358     |
| W101                    | O1B     | D/573           | U/217     | D/546     | U/219                  | D/507                   | D/520                   | D/536                   | D/508     |
| W102                    | O1B     | B/863           | B/856     | D/817     | x                      | x                       | x                       | x                       | B/853     |
| W103                    | O1A     | C/660           | C/703     | C/625     | x                      | x                       | C/667                   | x                       | x         |
| W104                    | O1A     | C/770           | C/759     | C/724     | C/691                  | x                       | C/747                   | x                       | x         |
| W106                    | O1A     | C/772           | C/761     | C/714     | C/632                  | x                       | C/742                   | x                       | C/721     |
| W107                    | O1A     | C/662           | C/649     | x         | x                      | C/634                   | C/679                   | x                       | C/685     |
| W117                    | C11A    | D/623           | D/615     | x         | x                      | D/578                   | D/608                   | D/615                   | D/615     |
| W119                    | C11A    | A/577           | A/558     | A/504     | A/587                  | A/726                   | A/757                   | A/543                   | A/573     |
| W120                    | C11A    | x               | x         | x         | x                      | x                       | x                       | x                       | x         |
| W121                    | C11A    | O/384           | O/366     | O/353     | x                      | O/357                   | O/373                   | O/372                   | O/382     |
| W122                    | C11A    | O/339           | O/335     | O/337     | O/335                  | O/354                   | O/318                   | O/334                   | O/348     |
| W125                    | C11A    | O/348           | O/332     | O/316     | O/333                  | O/322                   | O/326                   | O/332                   | D/595     |
| W126                    | C11A    | O/399           | D/617     | D/580     | D/592                  | O/364                   | O/382                   | D/608                   | D/605     |
| W127                    | C11A    | A/595           | D/558     | D/528     | D/551                  | D/569                   | A/794                   | D/595                   | D/586     |
| W129                    | C11A    | A/556           | A/586     | A/553     | A/592                  | D/589                   | A/821                   | A/613                   | A/599     |
| W145                    | C11A    | x               | x         | x         | O/323                  | x                       | x                       | x                       | x         |
| W150                    | C11A    | x               | x         | x         | x                      | x                       | A/786                   | x                       | x         |
| W151                    | O1B     | x               | x         | x         | x                      | x                       | x                       | A/516                   | C/732     |
| 152                     | C11A    | A/539           | A/551     | A/552     | A/573                  | A/730                   | A/754                   | A/558                   | A/544     |
| 153                     | C11A    | O/325           | O/349     | O/344     | x                      | O/324                   | O/347                   | O/329                   | O/329     |
| 154                     | C11A    | O/357           | O/352     | x         | x                      | O/353                   | O/353                   | O/354                   | O/367     |
| 160                     | C11B    | B/740           | B/753     | B/771     | B/802                  | B/764                   | B/740                   | B/758                   | B/808     |
| 161                     | C11B    | D/518           | D/534     | D/536     | D/514                  | D/527                   | D/516                   | D/559                   | D/522     |
| 162                     | C11B    | B/769           | B/779     | B/786     | B/807                  | x                       | B/796                   | B/829                   | B/728     |
| 163                     | C11B    | D/543           | D/545     | O/329     | O/324                  | D/523                   | D/514                   | D/532                   | O/331     |
| 164                     | C11B    | O/336           | O/324     | x         | O/312                  | O/329                   | O/314                   | O/326                   | O/315     |
| 165                     | C11B    | B/785           | B/746     | B/733     | B/757                  | B/762                   | B/766                   | B/780                   | B/764     |
| 166                     | C11B    | B/821           | B/770     | B/748     | x                      | B/724                   | B/752                   | B/804                   | B/767     |
| 167                     | C11B    | D/615           | D/598     | D/587     | D/566                  | D/590                   | D/601                   | D/582                   | D/585     |
| 168                     | C11B    | O/319           | B/826     | O/335     | x                      | B/768                   | O/325                   | O/328                   | O/332     |
| 169                     | C11B    | B/774           | x         | x         | x                      | x                       | x                       | x                       | x         |
| 170                     | C11B    | O/369           | x         | x         | x                      | O/318                   | x                       | x                       | O/364     |
| 180                     | O4      | O/327           | O/337     | O/330     | O/316                  | O/306                   | O/312                   | O/321                   | O/317     |
| 181                     | O4      | U/211           | U/220     | U/208     | U/207                  | U/204                   | U/216                   | U/218                   | U/208     |
| 182                     | O4      | O/404           | O/387     | O/379     | U/229                  | U/231                   | O/389                   | O/379                   | O/395     |
| 183                     | O4      | U/243           | U/236     | U/232     | U/228                  | U/224                   | U/239                   | U/230                   | U/229     |
| 184                     | O4      | U/232           | U/231     | U/223     | U/221                  | U/215                   | U/225                   | U/227                   | U/225     |
| 190                     | O1B     | D/528           | D/593     | x         | x                      | D/517                   | D/580                   | D/538                   | x         |
| 191                     | O1B     | D/633           | D/628     | D/599     | x                      | x                       | D/613                   | x                       | D/626     |
| 192                     | O1A     | C/628           | x         | x         | x                      | x                       | C/648                   | x                       | C/709     |
| 193                     | O1A     | C/643           | x         | C/675     | x                      | x                       | x                       | x                       | C/655     |
| 194                     | O1A     | C/625           | C/741     | C/684     | C/649                  | x                       | x                       | C/616                   | C/720     |
| 195                     | O1A     | C/714           | C/713     | x         | V/312                  | x                       | x                       | x                       | V/311     |
| 196                     | O1A     | C/762           | x         | x         | x                      | x                       | x                       | x                       | C/721     |
| 197                     | O1A     | C/728           | C/708     | x         | C/638                  | x                       | C/686                   | C/678                   | C/687     |

**Supplementary Table 4. The peak heights of individually generated polder-omit maps for waters present in the water channels and up to approximately 15 Å from the OEC at 0F, 1F, 2F and the time points between 1F and 2F in both monomers (m1) and (m2). The waters with 3-5  $\sigma$  are depicted in bold.**

| <b>m1</b> |       |             |       |             |       |       |             | <b>m2</b> |             |       |       |             |             |             |       |
|-----------|-------|-------------|-------|-------------|-------|-------|-------------|-----------|-------------|-------|-------|-------------|-------------|-------------|-------|
| W         | 0F    | 1F          | 2F50  | 2F150       | 2F250 | 2F400 | 2F          | W         | 0F          | 1F    | 2F50  | 2F150       | 2F250       | 2F400       | 2F    |
| 19        | 12.02 | 9.9         | 8.26  | 10.2        | 9.83  | 10.51 | 9.02        | 19        | 10.61       | 8.06  | 7.8   | 8.7         | 9.68        | 9.27        | 9.17  |
| 20        | 7.67  | --          | --    | --          | --    | --    | --          | 20        | 6.75        | --    | --    | --          | --          | --          | --    |
| 21        | 10.83 | 10.56       | 8.6   | 8.75        | 11.49 | 10.11 | 10.24       | 21        | 9.78        | 10.81 | 10.35 | 9.96        | 10.83       | 10.61       | 10.72 |
| 22        | 9.58  | 9.21        | 9.3   | 7.45        | 10.78 | 10.55 | 8.91        | 22        | 9.23        | 10.23 | 10.41 | 9.19        | 10.06       | 10.64       | 10.62 |
| 23        | 10.79 | 9.9         | 10.01 | 8.49        | 10.84 | 10.06 | 9.26        | 23        | 9.77        | 8.97  | 7.23  | 8.75        | 9.8         | 9.5         | 9.12  |
| 24        | 9.49  | 8.92        | 7.44  | 7.97        | 9.12  | 8.55  | 8.76        | 24        | 9.89        | 9.88  | 8.74  | 9           | 9.32        | 9.17        | 9.66  |
| 25        | 9.00  | 8.98        | 5.61  | 9.15        | 11.63 | 11.5  | 10.31       | 25        | 8.79        | 9.23  | 8.95  | 9.53        | 10.17       | 10.32       | 9.01  |
| 26        | 9.5   | 6.9         | 6.95  | 7.62        | 8.17  | 7.45  | 7.44        | 26        | 8.86        | 8.56  | 8.12  | 8.99        | 8.96        | 8.26        | 7.29  |
| 27        | 8.85  | 6.24        | 5.63  | 4.73        | 6.73  | 7.91  | 6.75        | 27        | 6.82        | 5.6   | 7.12  | 4.08        | 5.03        | 4.2         | 6.14  |
| 28        | 7.61  | 7.21        | 6.6   | 6.74        | 8.47  | 6.69  | 6.89        | 28        | 7.77        | 7.24  | 6.8   | 9.11        | 8.71        | 7.98        | 6.85  |
| 29        | 9.5   | 10.01       | 8.22  | 7.91        | 9.23  | 8.42  | 8.16        | 29        | 8.97        | 8.42  | 8.23  | 8.48        | 8.56        | 9.15        | 9.14  |
| 30        | 7.8   | 6.71        | 4.74  | 6.73        | 7.21  | 6.65  | 6.23        | 30        | 7.74        | 7.6   | 8.45  | 7.26        | 7.19        | 7.14        | 8.22  |
| 31        | 7.88  | 7.66        | 7.34  | 6.88        | 6.58  | 6.34  | 7.76        | 31        | 6.5         | 6.85  | 5.93  | 6.32        | 7.85        | 6.84        | 7.61  |
| 32        | 6.85  | 7.77        | 7.2   | 6.48        | 6.28  | 6.65  | 6.25        | 32        | 7.68        | 8.35  | 6.28  | 6.47        | 8.37        | 6.25        | 6.28  |
| 33        | 9.1   | 8.56        | 8.33  | 7.58        | 9.2   | 8.07  | 7.67        | 33        | 9.8         | 8.29  | 9.13  | 9.82        | 9.17        | 8.55        | 9.9   |
| 34        | 8.03  | 6.55        | 6.75  | 5.78        | 7.58  | 7.1   | 7.09        | 34        | 6.34        | 7.66  | 5.71  | 7.52        | 7.07        | 7.5         | 7.89  |
| 35        | 6.46  | 6.98        | 6.76  | 7.48        | 5.8   | 6.72  | 6.67        | 35        | 7.84        | 8.24  | 7.06  | 7.96        | 6.42        | 6.94        | 6.96  |
| 36        | 9.53  | 8.63        | 7.87  | 9.05        | 8.6   | 9.87  | 9.86        | 36        | 8           | 7.95  | 6.64  | 8.78        | 9.04        | 8.32        | 7.52  |
| 37        | 6.63  | 6.81        | 6.33  | 7.57        | 6.25  | 5.66  | 6.49        | 37        | 5.62        | 6.67  | 5.32  | 6.02        | 7.76        | 7.82        | 6.1   |
| 38        | 7.05  | 6.36        | 6.49  | 6.97        | 8.23  | 6.41  | 7.23        | 38        | 8.7         | 7.88  | 6.64  | 9.01        | 9.58        | 8.73        | 7.44  |
| 39        | 4.59  | <b>3.61</b> | 5.1   | 5.71        | 4.82  | 5.67  | 5.13        | 39        | --          | --    | --    | <b>4.34</b> | --          | <b>4.16</b> | 5.33  |
| 40        | 9.08  | 8.19        | 8.13  | 8.19        | 10.4  | 8.37  | 8.64        | 40        | 9.79        | 8.83  | 6.83  | 7.34        | 8.87        | 9.14        | 8.85  |
| 41        | 9.47  | 8.04        | 9.36  | 7.94        | 8.94  | 8.93  | 8.46        | 41        | 8.85        | 10.99 | 8.46  | 8.44        | 10.32       | 10.39       | 10.07 |
| 42        | 9.69  | 11.02       | 9.26  | 10.08       | 11.1  | 10.59 | 9.85        | 42        | 8           | 8.82  | 8.69  | 8.44        | 9.27        | 9.3         | 9.19  |
| 43        | 10.15 | 9.32        | 9.74  | 8.5         | 10.6  | 8.47  | 10.4        | 43        | 8.33        | 6.85  | 7.06  | 8.54        | 8.82        | 8.52        | 9.49  |
| 44        | 8.79  | 7.84        | 7.68  | 6.72        | 9.17  | 8.12  | 8.36        | 44        | 8.95        | 7.09  | 8.78  | 7.7         | 8.5         | 7.72        | 8.16  |
| 45        | 9.3   | 9.9         | 11.08 | 10.32       | 10.62 | 10.29 | 9.99        | 45        | 8.47        | 9.32  | 10.34 | 10.13       | 9.76        | 9.09        | 9.84  |
| 46        | 10.36 | 9.98        | 8.04  | 10.79       | 10.65 | 9.7   | 10.11       | 46        | 11.07       | 9.17  | 9.64  | 10.39       | 11.44       | 10.32       | 10.77 |
| 47        | 10.41 | 11.41       | 8.55  | 9.77        | 11.03 | 10.86 | 10.57       | 47        | 8.94        | 9.93  | 9.07  | 9.59        | 10.85       | 10.73       | 9.95  |
| 48        | 10.13 | 10.44       | 8.45  | 9.35        | 10.77 | 9.23  | 9.42        | 48        | 11.83       | 9.7   | 10.66 | 10.29       | 9.84        | 10.24       | 10.09 |
| 49        | 8.89  | 9           | 5.8   | 7.78        | 8.5   | 7.97  | 9.18        | 49        | 9.37        | 10    | 8.22  | 9           | 9.33        | 9.72        | 8.33  |
| 50        | 8.05  | 8.28        | 7.11  | 7.41        | 7.84  | 7.6   | 8.17        | 50        | 9.28        | 8.01  | 7.98  | 9.33        | 8.7         | 7.51        | 7.42  |
| 51        | 8.13  | 8.99        | 7.18  | 8.29        | 8.32  | 8.71  | 8           | 51        | 7.92        | 8.42  | 8.35  | 7.7         | 8.14        | 8.51        | 7.42  |
| 52        | 9.28  | 9.07        | 7.67  | 8.77        | 9.75  | 9.94  | 8.64        | 52        | 8.91        | 7.87  | 7.96  | 9.49        | 9.93        | 8.65        | 8.62  |
| 53        | 8.81  | 9.96        | 7.57  | 9.9         | 10.48 | 9.61  | 8.9         | 53        | 9.24        | 9.5   | 9.2   | 10.46       | 9.72        | 10.87       | 9.97  |
| 54        | 9.46  | 8.07        | 8.09  | 8.85        | 8.96  | 9.3   | 8.38        | 54        | 8.78        | 8.88  | 9.68  | 9.42        | 9.71        | 8.65        | 8.84  |
| 55        | 7.57  | 7.73        | 7.03  | 7.71        | 8.39  | 8.86  | 9.07        | 55        | 8.84        | 7.85  | 8.2   | 8.61        | 8.35        | 7.72        | 7.84  |
| 56        | 6.59  | 7.67        | 6.68  | 7.28        | 8.81  | 7.79  | 7.67        | 56        | 7.55        | 8.63  | 9.08  | 8.34        | 9.31        | 8.54        | 9.02  |
| 57        | 8.67  | 6.73        | 7.78  | 6.09        | 8.94  | 7.8   | 7.14        | 57        | 8.99        | 7.74  | 8.11  | 7.84        | 8.22        | 8.05        | 8.77  |
| 58        | 8.81  | 8.99        | 9.26  | 9.34        | 11.45 | 9.06  | 9.19        | 58        | 10.1        | 8.27  | 7.63  | 8.66        | 9.25        | 8.51        | 9     |
| 59        | 8.85  | 8.85        | 8.99  | 7.57        | 9.83  | 9.28  | 8.12        | 59        | 9.49        | 9.62  | 7.72  | 8.57        | 8.54        | 7.47        | 9.73  |
| 60        | 8.48  | 8.22        | 8.02  | 9.72        | 9.47  | 9.6   | 8.31        | 60        | 10.21       | 10.56 | 9.03  | 10.4        | 9.43        | 9.58        | 10.64 |
| 61        | 9.35  | 9.29        | 9.59  | 8.81        | 10.58 | 10.34 | 9.48        | 61        | 9.96        | 8.63  | 6.34  | 8.56        | 8.85        | 9.74        | 10.18 |
| 62        | 10.29 | 10.43       | 8.37  | 9.64        | 9.73  | 9.25  | 9.38        | 62        | 10.25       | 8.58  | 9.39  | 9.37        | 10.81       | 11.76       | 10.5  |
| 63        | 9.88  | 8.61        | 6.77  | 7.93        | 10.01 | 6.94  | 9.55        | 63        | 8.6         | 9.31  | 8.08  | 8.82        | 10.06       | 10.49       | 10.07 |
| 64        | 8.65  | 9.03        | 6.78  | 8.82        | 9.5   | 8.16  | 8.61        | 64        | 9.23        | 8.42  | 7.76  | 9.06        | 10.24       | 9.07        | 9.37  |
| 65        | 8.3   | 7.66        | 7.54  | 7.3         | 6.99  | 8.02  | 7.61        | 65        | 8.57        | 8.01  | 7.87  | 7.67        | 8.52        | 8.75        | 7.72  |
| 66        | 10.96 | 10.78       | 10.61 | 10.23       | 11.88 | 10.95 | 10.11       | 66        | 10.96       | 11.4  | 9.36  | 10.06       | 12.25       | 11.8        | 11.7  |
| 67        | 11.36 | 9.45        | 9.29  | 11.45       | 10.98 | 10.79 | 10.68       | 67        | 10.48       | 10.51 | 9.28  | 9.51        | 11.21       | 10.95       | 11.22 |
| 68        | 10.71 | 10.92       | 9.59  | 9.73        | 11.07 | 10    | 10.74       | 68        | 9.01        | 9.51  | 8.17  | 9.08        | 10.97       | 9.23        | 9.49  |
| 69        | 10.82 | 10.65       | 10    | 9.22        | 11.96 | 11.77 | 10.39       | 69        | 9.14        | 8.72  | 7.84  | 9.79        | 10.3        | 10.15       | 9.17  |
| 70        | 10.49 | 8.9         | 8.2   | 10.68       | 12.31 | 10.65 | 10.21       | 70        | 9.76        | 8.55  | 9.02  | 9.58        | 10.18       | 9.9         | 10.32 |
| 71        | 7.01  | 7.34        | 5.9   | 7.02        | 9.01  | 8.15  | 8.22        | 71        | 8.24        | 10.13 | 7.47  | 7.47        | 9.02        | 8.08        | 9.59  |
| 72        | 8.1   | 9.06        | 5.37  | 8.7         | 8.73  | 8.72  | 7.55        | 72        | 7.06        | 8.4   | 7.23  | 8.08        | 9.23        | 8.23        | 8.7   |
| 73        | 10.24 | 9.4         | 8.89  | 9.32        | 10.35 | 10.21 | 9.3         | 73        | 8.37        | 8.56  | 6.96  | 9.04        | 8.26        | 8.18        | 8.24  |
| 74        | 10.29 | 10.05       | 10.63 | 10.67       | 11.61 | 10.09 | 10.41       | 74        | 8.56        | 9.04  | 8.1   | 8.91        | 9.19        | 8.47        | 9.85  |
| 75        | 10.29 | 9.84        | 8.87  | 8.95        | 11.52 | 10.03 | 8.51        | 75        | 9.67        | 10.22 | 8.33  | 9.34        | 10.81       | 8.76        | 9.2   |
| 76        | 6.12  | 6.44        | 5.4   | 6.6         | 5.13  | 6.41  | <b>3.28</b> | 76        | <b>4.72</b> | 6.42  | 5.65  | 5.86        | <b>4.77</b> | 5.33        | 6.43  |
| 77        | 6.05  | <b>4.74</b> | 5.19  | <b>4.13</b> | 5.5   | 6.06  | 5.58        | 77        | 5.11        | 6.64  | 5.38  | 5.51        | 5.16        | 5.64        | 5.34  |

**Supplementary Table 5. The B-factor ( $\text{\AA}^2$ ) of waters present in the water channels and up to approximately 15  $\text{\AA}$  from the OEC at 0F, 1F, 2F and the time points between 1F and 2F in both monomers (m1) and (m2).**

| m1 |      |      |      |       |       |       |      | m2   |      |      |      |       |       |       |      |
|----|------|------|------|-------|-------|-------|------|------|------|------|------|-------|-------|-------|------|
| W  | 0F   | 1F   | 2F50 | 2F150 | 2F250 | 2F400 | 2F   | W    | 0F   | 1F   | 2F50 | 2F150 | 2F250 | 2F400 | 2F   |
| 19 | 19.9 | 32.5 | 41.0 | 28.7  | 26.8  | 27.0  | 37.5 | 19.0 | 21.9 | 33.9 | 32.0 | 30.1  | 22.6  | 27.9  | 25.8 |
| 20 | 33.0 | --   | --   | --    | --    | --    | --   | 20.0 | 27.2 | --   | --   | --    | --    | --    | --   |
| 21 | 22.9 | 27.5 | 32.4 | 33.7  | 26.3  | 30.9  | 34.4 | 21.0 | 21.9 | 24.2 | 26.9 | 30.0  | 21.9  | 24.8  | 24.7 |
| 22 | 29.2 | 30.2 | 30.4 | 28.9  | 25.6  | 26.0  | 31.6 | 22.0 | 29.4 | 26.5 | 26.6 | 32.4  | 25.9  | 25.0  | 27.3 |
| 23 | 26.9 | 32.7 | 33.7 | 32.3  | 25.3  | 25.1  | 33.7 | 23.0 | 22.7 | 26.2 | 32.6 | 32.6  | 24.7  | 24.9  | 24.7 |
| 24 | 30.4 | 35.8 | 36.4 | 31.9  | 28.1  | 27.6  | 31.6 | 24.0 | 26.2 | 27.5 | 40.6 | 35.1  | 29.4  | 27.0  | 31.9 |
| 25 | 60.5 | 28.7 | 36.5 | 30.7  | 22.5  | 21.8  | 27.1 | 25.0 | 29.3 | 28.1 | 33.9 | 31.5  | 22.3  | 29.0  | 34.6 |
| 26 | 30.2 | 36.8 | 40.0 | 32.4  | 26.6  | 27.5  | 29.4 | 26.0 | 33.1 | 35.8 | 35.3 | 30.3  | 25.5  | 30.5  | 32.5 |
| 27 | 31.9 | 37.1 | 39.3 | 32.1  | 29.6  | 30.3  | 34.3 | 27.0 | 34.0 | 34.6 | 39.4 | 34.3  | 31.4  | 33.5  | 34.1 |
| 28 | 36.6 | 32.6 | 41.1 | 34.0  | 27.1  | 31.8  | 38.4 | 28.0 | 35.6 | 34.2 | 37.5 | 32.3  | 26.1  | 28.3  | 34.2 |
| 29 | 32.0 | 32.9 | 38.2 | 37.2  | 31.5  | 33.2  | 39.4 | 29.0 | 34.9 | 37.5 | 37.7 | 35.7  | 27.8  | 30.1  | 35.3 |
| 30 | 36.1 | 39.0 | 48.5 | 39.4  | 33.8  | 34.2  | 40.0 | 30.0 | 40.9 | 37.3 | 41.0 | 39.5  | 32.3  | 33.2  | 43.0 |
| 31 | 37.8 | 39.6 | 40.4 | 37.3  | 32.2  | 32.9  | 37.5 | 31.0 | 39.7 | 37.0 | 39.9 | 37.1  | 30.3  | 36.1  | 36.9 |
| 32 | 37.3 | 40.3 | 38.1 | 36.2  | 32.7  | 31.3  | 37.9 | 32.0 | 36.8 | 36.1 | 42.4 | 40.9  | 29.1  | 33.4  | 38.1 |
| 33 | 29.9 | 35.6 | 38.1 | 39.3  | 29.5  | 35.5  | 38.8 | 33.0 | 29.0 | 36.2 | 31.8 | 33.3  | 34.0  | 34.7  | 35.0 |
| 34 | 32.0 | 39.3 | 40.0 | 42.0  | 36.8  | 35.6  | 39.8 | 34.0 | 43.8 | 43.1 | 46.7 | 45.9  | 42.3  | 42.0  | 44.5 |
| 35 | 41.1 | 39.4 | 45.2 | 36.0  | 36.2  | 38.3  | 46.5 | 35.0 | 37.5 | 39.6 | 41.2 | 39.1  | 39.5  | 38.1  | 44.5 |
| 36 | 28.7 | 35.6 | 40.0 | 32.5  | 30.5  | 29.2  | 30.7 | 36.0 | 33.3 | 37.8 | 43.1 | 36.3  | 35.3  | 33.2  | 36.8 |
| 37 | 37.7 | 39.4 | 42.5 | 38.4  | 35.9  | 38.4  | 42.8 | 37.0 | 45.2 | 41.3 | 45.2 | 43.7  | 39.8  | 37.4  | 45.0 |
| 38 | 32.7 | 39.3 | 43.0 | 37.6  | 29.9  | 32.0  | 40.4 | 38.0 | 29.2 | 36.5 | 42.7 | 36.6  | 32.0  | 33.5  | 40.7 |
| 39 | 36.8 | 35.5 | 36.5 | 34.9  | 27.0  | 31.9  | 37.1 | 39.0 | --   | --   | --   | 32.1  | --    | 30.1  | 39.4 |
| 40 | 31.9 | 30.4 | 36.3 | 29.4  | 22.1  | 34.9  | 28.9 | 40.0 | 24.8 | 31.0 | 40.3 | 34.9  | 27.1  | 27.0  | 31.8 |
| 41 | 28.7 | 33.7 | 30.8 | 30.4  | 30.0  | 31.3  | 32.2 | 41.0 | 31.4 | 26.8 | 31.9 | 32.2  | 25.6  | 23.6  | 28.0 |
| 42 | 27.5 | 24.7 | 36.9 | 27.1  | 25.1  | 27.8  | 26.1 | 42.0 | 28.7 | 32.6 | 28.1 | 28.3  | 25.0  | 27.0  | 24.2 |
| 43 | 24.8 | 30.1 | 30.0 | 36.9  | 27.0  | 31.5  | 30.7 | 43.0 | 27.5 | 30.9 | 33.9 | 29.4  | 28.1  | 31.8  | 28.5 |
| 44 | 30.3 | 37.3 | 37.8 | 36.3  | 25.5  | 30.8  | 37.2 | 44.0 | 22.6 | 29.4 | 30.0 | 33.1  | 20.8  | 27.2  | 26.7 |
| 45 | 27.3 | 25.6 | 24.6 | 23.4  | 25.8  | 25.9  | 30.4 | 45.0 | 29.9 | 27.9 | 25.0 | 28.1  | 29.4  | 29.5  | 26.3 |
| 46 | 22.2 | 25.0 | 32.0 | 25.8  | 24.7  | 25.5  | 33.1 | 46.0 | 16.3 | 31.2 | 30.4 | 26.9  | 24.3  | 28.9  | 23.4 |
| 47 | 20.7 | 20.2 | 34.9 | 29.5  | 23.5  | 23.8  | 27.4 | 47.0 | 27.5 | 26.3 | 30.2 | 29.1  | 25.2  | 23.3  | 27.5 |
| 48 | 28.9 | 29.4 | 35.5 | 35.8  | 27.5  | 32.2  | 30.8 | 48.0 | 18.7 | 27.6 | 23.1 | 27.3  | 27.1  | 28.7  | 27.4 |
| 49 | 29.9 | 25.4 | 38.5 | 32.8  | 23.8  | 28.5  | 29.4 | 49.0 | 23.1 | 25.0 | 36.7 | 31.7  | 28.1  | 23.5  | 31.3 |
| 50 | 36.6 | 38.0 | 36.5 | 38.5  | 29.5  | 31.1  | 37.7 | 50.0 | 26.6 | 33.6 | 36.0 | 33.0  | 28.1  | 31.9  | 37.3 |
| 51 | 35.0 | 36.6 | 43.2 | 34.5  | 32.4  | 32.5  | 39.1 | 51.0 | 36.9 | 36.9 | 35.9 | 38.4  | 27.6  | 31.8  | 37.2 |
| 52 | 28.2 | 31.6 | 38.3 | 30.0  | 28.3  | 30.2  | 34.8 | 52.0 | 34.7 | 35.0 | 40.8 | 33.0  | 26.5  | 34.5  | 36.5 |
| 53 | 29.6 | 26.7 | 37.1 | 31.0  | 23.8  | 28.3  | 32.8 | 53.0 | 24.6 | 32.7 | 30.0 | 30.5  | 26.0  | 23.6  | 31.6 |
| 54 | 30.3 | 41.6 | 41.4 | 39.8  | 34.3  | 34.8  | 40.1 | 54.0 | 35.2 | 36.8 | 33.0 | 35.6  | 31.1  | 35.4  | 40.2 |
| 55 | 39.3 | 34.7 | 38.9 | 36.0  | 31.3  | 32.2  | 34.0 | 55.0 | 39.7 | 41.8 | 38.4 | 39.4  | 38.0  | 35.9  | 44.4 |
| 56 | 34.8 | 34.2 | 36.1 | 29.2  | 27.2  | 31.9  | 35.6 | 56.0 | 43.1 | 39.2 | 36.4 | 41.3  | 37.1  | 37.7  | 40.3 |
| 57 | 26.6 | 28.7 | 39.5 | 33.8  | 25.3  | 28.4  | 30.2 | 57.0 | 31.5 | 42.4 | 39.4 | 38.8  | 32.1  | 35.0  | 40.1 |
| 58 | 26.5 | 27.5 | 29.0 | 26.7  | 24.3  | 26.3  | 27.5 | 58.0 | 27.0 | 32.9 | 41.8 | 31.2  | 30.1  | 34.7  | 32.8 |
| 59 | 32.7 | 30.2 | 32.3 | 31.5  | 24.4  | 26.3  | 35.0 | 59.0 | 23.8 | 30.0 | 34.6 | 28.8  | 27.6  | 32.7  | 32.1 |
| 60 | 29.6 | 31.2 | 41.2 | 27.9  | 24.4  | 27.1  | 34.1 | 60.0 | 25.9 | 29.6 | 31.8 | 31.3  | 28.2  | 30.8  | 29.4 |
| 61 | 32.1 | 30.3 | 28.3 | 25.2  | 26.9  | 26.3  | 32.4 | 61.0 | 25.8 | 29.4 | 30.5 | 30.8  | 25.8  | 20.8  | 23.7 |
| 62 | 25.5 | 29.4 | 34.3 | 28.7  | 27.5  | 23.7  | 29.9 | 62.0 | 20.1 | 31.8 | 25.2 | 26.9  | 24.5  | 21.9  | 25.2 |
| 63 | 24.2 | 36.4 | 41.9 | 34.8  | 22.5  | 30.5  | 30.3 | 63.0 | 34.7 | 31.9 | 39.8 | 36.8  | 31.1  | 26.5  | 35.4 |
| 64 | 33.4 | 30.6 | 37.8 | 34.8  | 29.1  | 29.5  | 32.9 | 64.0 | 27.6 | 31.1 | 37.2 | 39.2  | 28.4  | 32.1  | 34.3 |
| 65 | 29.9 | 32.8 | 34.0 | 31.2  | 24.0  | 25.5  | 36.1 | 65.0 | 31.3 | 30.6 | 31.6 | 34.3  | 25.0  | 28.6  | 32.5 |
| 66 | 22.4 | 25.9 | 29.4 | 29.6  | 24.0  | 23.9  | 27.1 | 66.0 | 20.6 | 25.5 | 33.6 | 31.0  | 21.8  | 22.2  | 26.7 |
| 67 | 21.3 | 30.3 | 33.8 | 26.8  | 24.1  | 25.5  | 28.0 | 67.0 | 21.9 | 24.0 | 25.9 | 26.5  | 23.3  | 24.9  | 26.2 |
| 68 | 24.3 | 24.9 | 33.4 | 34.2  | 26.6  | 27.5  | 30.0 | 68.0 | 29.9 | 32.5 | 34.3 | 27.6  | 24.6  | 29.8  | 30.0 |
| 69 | 27.4 | 22.8 | 31.2 | 36.2  | 28.6  | 22.5  | 30.7 | 69.0 | 29.2 | 31.9 | 38.2 | 26.2  | 27.0  | 27.0  | 29.3 |
| 70 | 23.6 | 27.5 | 34.0 | 26.5  | 22.4  | 27.5  | 27.8 | 70.0 | 24.5 | 29.4 | 31.7 | 27.7  | 26.9  | 25.0  | 24.5 |
| 71 | 34.8 | 29.1 | 30.6 | 33.0  | 27.2  | 26.1  | 31.9 | 71.0 | 30.8 | 34.4 | 35.2 | 33.7  | 26.7  | 35.4  | 35.2 |
| 72 | 30.7 | 28.6 | 35.2 | 30.9  | 27.0  | 25.2  | 35.0 | 72.0 | 36.1 | 40.0 | 43.5 | 36.9  | 32.1  | 34.3  | 35.9 |
| 73 | 31.8 | 34.9 | 37.8 | 37.0  | 33.3  | 31.7  | 35.8 | 73.0 | 34.6 | 33.5 | 39.6 | 33.0  | 30.3  | 33.3  | 37.7 |
| 74 | 25.8 | 27.3 | 25.0 | 29.2  | 22.7  | 28.9  | 29.0 | 74.0 | 30.3 | 32.1 | 40.2 | 29.7  | 28.8  | 29.4  | 35.5 |
| 75 | 27.8 | 31.7 | 33.7 | 35.0  | 26.7  | 30.3  | 33.6 | 75.0 | 25.6 | 24.6 | 34.4 | 31.7  | 24.8  | 33.2  | 33.1 |
| 76 | 34.1 | 44.9 | 46.9 | 42.2  | 39.6  | 41.5  | 41.5 | 76.0 | 48.6 | 45.5 | 49.6 | 49.5  | 49.1  | 43.3  | 47.0 |
| 77 | 34.2 | 43.1 | 53.7 | 41.2  | 36.0  | 38.4  | 45.5 | 77.0 | 43.9 | 42.8 | 51.6 | 45.5  | 43.3  | 35.5  | 44.2 |

**Supplementary Table 6. Comparison between number of water molecules detected in high resolution cryogenic data and RT data.** The table shows the total number of water molecules detected in the whole structure and within 3.5 Å of each water channel. Number of water molecules in the channels between cryogenic data and RT data are quite comparable. However, water molecules detected in O1 Channel B are higher in cryogenic data than RT.

|                                                                 | 4UB6                      | 5B66                        | combined data(PDB ID 7RF1) |
|-----------------------------------------------------------------|---------------------------|-----------------------------|----------------------------|
| X-ray source                                                    | XFEL                      | synchrotron                 | XFEL                       |
| Temperature during collection                                   | cryo                      | cryo                        | RT                         |
| Radiation                                                       | Damage free               | 0.03 MGy                    | Damage free                |
| State                                                           | 0F                        | 0F                          | Combined data (0F-3F)      |
| Resolution                                                      | 1.95 Å                    | 1.85 Å                      | 1.89 Å                     |
| Reference                                                       | Suga et al. <sup>13</sup> | Tanaka et al. <sup>14</sup> | Current study              |
| No. of water molecules in the structure                         | 2624                      | 4066                        | 1960                       |
| No. of water molecules in O1 Channel A                          | 19                        | 20                          | 20                         |
| No. of water molecules in O1 Channel B                          | 23                        | 28                          | 18                         |
| No. of water molecules in O4 Channel                            | 20                        | 20                          | 18                         |
| No. of water molecules in C11 Channel A                         | 16                        | 16                          | 16                         |
| No. of water molecules in C11 Channel B                         | 26                        | 24                          | 23                         |
| No. of water molecules in the channels                          | 104                       | 108                         | 95                         |
| No. of water molecules in the channels within 5 Å from the bulk | 25                        | 22                          | 16                         |

**Supplementary Table 7. Number of cryo-protectant or additive molecules detected in RT and cryo-structure data**

| PDB (ID) | Reference                   | State | Sample condition | Cryo-protectant/additives | Numbers of cryo-protectant molecules |
|----------|-----------------------------|-------|------------------|---------------------------|--------------------------------------|
| 6JLJ     | Suga et al. <sup>1</sup>    | 0F    | cryo             | glycerol                  | 20                                   |
| 4UB6     | Suga et al. <sup>13</sup>   | 0F    | cryo             | glycerol                  | 39                                   |
| 5WS5     | Suga et al. <sup>15</sup>   | 0F    | RT               | glycerol                  | 5                                    |
| 5B5E     | Tanaka et al. <sup>14</sup> | 0F    | cryo             | DMSO                      | 112                                  |
| 5B66     | Tanaka et al. <sup>14</sup> | 0F    | cryo             | DMSO                      | 97                                   |
| 3WU2     | Umena et al. <sup>7</sup>   | 0F    | cryo             | glycerol                  | 36                                   |

**Supplementary References**

1. Suga M, *et al.* An oxy/oxo mechanism for oxygen-oxygen coupling in PSII revealed by an x-ray free-electron laser. *Science* **366**, 334-338 (2019).
2. Kern J, *et al.* Structures of the intermediates of Kok's photosynthetic water oxidation clock. *Nature* **563**, 421-425 (2018).
3. Chovancova E, *et al.* CAVER 3.0: a tool for the analysis of transport pathways in dynamic protein structures. *PLoS Comput. Biol.* **8**, e1002708 (2012).
4. Ho FM, Styring S. Access channels and methanol binding site to the CaMn<sub>4</sub> cluster in Photosystem II based on solvent accessibility simulations, with implications for substrate water access. *Biochim. Biophys. Acta* **1777**, 140-153 (2008).
5. Murray JW, Barber J. Structural characteristics of channels and pathways in photosystem II including the identification of an oxygen channel. *J. Struct. Biol.* **159**, 228-237 (2007).
6. Gabdulkhakov A, *et al.* Probing the accessibility of the Mn<sub>4</sub>Ca cluster in photosystem II: channels calculation, noble gas derivatization, and cocrystallization with DMSO. *Structure* **17**, 1223-1234 (2009).
7. Umena Y, Kawakami K, Shen J-R, Kamiya N. Crystal structure of oxygen-evolving photosystem II at a resolution of 1.9 Å. *Nature* **473**, 55-60 (2011).
8. Vassiliev S, Zaraiskaya T, Bruce D. Exploring the energetics of water permeation in photosystem II by multiple steered molecular dynamics simulations. *Biochim. Biophys. Acta* **1817**, 1671-1678 (2012).
9. Ogata K, Yuki T, Hatakeyama M, Uchida W, Nakamura S. All-atom molecular dynamics simulation of photosystem II embedded in thylakoid membrane. *J Am Chem Soc* **135**, 15670-15673 (2013).
10. Sakashita N, Watanabe HC, Ikeda T, Saito K, Ishikita H. Origins of water molecules in the photosystem II crystal structure. *Biochemistry* **56**, 3049-3057 (2017).
11. Weisz DA, Gross ML, Pakrasi HB. Reactive oxygen species leave a damage trail that reveals water channels in Photosystem II. *Sci. Adv.* **3**, eaao3013 (2017).
12. Hattne J, *et al.* Accurate macromolecular structures using minimal measurements from X-ray free-electron lasers. *Nat Methods* **11**, 545-548 (2014).

13. Suga M, *et al.* Native structure of photosystem II at 1.95 Å resolution viewed by femtosecond X-ray pulses. *Nature* **517**, 99-103 (2015).
14. Tanaka A, Fukushima Y, Kamiya N. Two different structures of the oxygen-evolving complex in the same polypeptide frameworks of photosystem II. *J. Am. Chem. Soc.* **139**, 1718-1721 (2017).
15. Suga M, *et al.* Light-induced structural changes and the site of O=O bond formation in PSII caught by XFEL. *Nature* **543**, 131-135 (2017).
